# Supplementary material for: Inequalities in the care experiences of patients with cancer: analysis of data from the National Cancer Patient Experience Survey 2011–2012
Source: PubMed Central journal article supplement (PMC3927926; doi:10.1136/bmjopen-2013-004567), 2014-02-14
Supplement: bmjopen-2013-004567.draft_revisions.pdf [file bmjopen-2013-004567.draft_revisions.pdf]

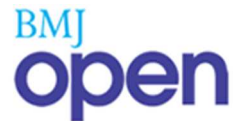

**Inequalities in cancer patients' experiences of care: analysis of data from the National Cancer Patient Experience Survey 2011-12**

|                                 |                                                                                                                                                                                                                                                                                                                                                                                       |
|---------------------------------|---------------------------------------------------------------------------------------------------------------------------------------------------------------------------------------------------------------------------------------------------------------------------------------------------------------------------------------------------------------------------------------|
| Journal:                        | <i>BMJ Open</i>                                                                                                                                                                                                                                                                                                                                                                       |
| Manuscript ID:                  | bmjopen-2013-004567                                                                                                                                                                                                                                                                                                                                                                   |
| Article Type:                   | Research                                                                                                                                                                                                                                                                                                                                                                              |
| Date Submitted by the Author:   | 27-Nov-2013                                                                                                                                                                                                                                                                                                                                                                           |
| Complete List of Authors:       | Bone, Anna; Imperial College London, School of Public Health<br>Mc Grath-Lone, Louise; Imperial College London, Patient Experience Research Centre, School of Public Health<br>Day, Sophie; Imperial College London, Patient Experience Research Centre, School of Public Health<br>Ward, Helen; Imperial College London, Patient Experience Research Centre, School of Public Health |
| <b>Primary Subject Heading</b>: | Public health                                                                                                                                                                                                                                                                                                                                                                         |
| Secondary Subject Heading:      | Oncology                                                                                                                                                                                                                                                                                                                                                                              |
| Keywords:                       | PUBLIC HEALTH, ONCOLOGY, Adult oncology < ONCOLOGY                                                                                                                                                                                                                                                                                                                                    |
|                                 |                                                                                                                                                                                                                                                                                                                                                                                       |

SCHOLARONE™  
Manuscripts

1  
2  
3  
4  
5  
6  
7  
8  
9  
10  
11  
12  
13  
14  
15  
16  
17  
18  
19  
20  
21  
22  
23  
24  
25  
26  
27  
28  
29  
30  
31  
32  
33  
34  
35  
36  
37  
38  
39  
40  
41  
42  
43  
44  
45  
46  
47  
48  
49  
50  
51  
52  
53  
54  
55  
56  
57  
58  
59  
60

# Inequalities in cancer patients' experiences of care: analysis of data from the National Cancer Patient Experience Survey 2011-12

**Corresponding author:** Louise Mc Grath-Lone, Patient Experience Research Centre, School of Public Health, Imperial College London, W2 1PG, UK.

E-mail: Louise.mc-grath-lone@imperial.ac.uk

Phone: 0207 5943417

Fax: 0207 4023927

**Authors:** Anna Bone<sup>1</sup>, Louise Mc Grath-Lone<sup>2</sup>, Sophie Day<sup>2</sup>, Helen Ward.<sup>2</sup>

**Affiliations:**

1. School of Public Health, Imperial College London, W2 1PG, UK.
2. Patient Experience Research Centre, School of Public Health, Imperial College, London, W2 1PG, UK.

**Keywords:** Patient satisfaction, quality measurement, surveys

**Word count:** 2,814

## ABSTRACT

### Background

Patient experience is a key component of quality in healthcare; however, studies in the UK indicate that patients' experience of care is not equal across gender, age and ethnicity. There are currently 1.8 million people living with cancer in the UK but less is known about their experiences of care. Whether inequalities by socio-demographic characteristics exist amongst cancer patients is not well-documented.

### Methods

Using cross-sectional data from 71,793 cancer patients who completed the National Cancer Patient Experience Survey 2011-2012, we examined associations between patient, clinical and trust-level factors and a summary measure of patient experience, namely overall rating of care. Multivariate logistic regression was used to investigate variation by socio-demographic characteristics adjusting for other patient, clinical and trust-level factors.

### Results

Female, non-white and younger patients were less likely to rate their overall care as excellent or very good. Patients with long-standing conditions, particularly those with learning disabilities or mental health conditions also reported poorer overall care. This variation persisted when other patient, clinical and trust-level factors were controlled

1  
2 for, indicating there are real differences in experiences among cancer patients by  
3  
4 socio-demographic characteristics.  
5  
6  
7  
8

## 9 10 **Conclusion**

11  
12 There is evidence of inequalities in cancer patient experience in the UK by socio-  
13 demographic characteristics such as gender, age, ethnicity and disability. Quality  
14 cancer care services must strive to meet the needs of a diverse patient population  
15 equally; this study identifies patient groups for whom it appears cancer care services  
16 are in greatest need of improvement.  
17  
18  
19  
20  
21  
22  
23  
24  
25  
26  
27

## 28 **Article summary: Strengths and limitations of this study**

- 29  
30  
31
- 32 • To the authors' knowledge, this is the first study to explore cancer patients'  
33 overall rating of care by socio-demographic characteristics including  
34 longstanding-conditions or disabilities.  
35  
36
  - 37 • A principal strength of this study is the large sample size (> 71,000) and high  
38 response rate (68%).  
39  
40
  - 41 • As this study involves secondary analysis of national survey data it is limited by  
42 the type of data available e.g. the influence of potentially important predictors of  
43 patient experience such as employment status, level of deprivation and health  
44 status could not be explored as these data were not gathered.  
45  
46  
47  
48
  - 49 • A further limitation is that the binary categorisation of patients' responses  
50 condenses the patients' experiences (which were already limited to several  
51 multiple choice options) and may mask potentially significant variation.  
52  
53  
54  
55  
56  
57  
58  
59  
60

## INTRODUCTION

1  
2  
3  
4 Patient experience is a key component of quality in healthcare and is one of the top  
5  
6 priorities in the NHS (1). However, studies in the UK indicate that there are systematic  
7  
8 differences in patient experience by socio-demographic characteristics (2–4). For  
9  
10 example, studies on primary and hospital care have found that patients tend to report  
11  
12 more positive experiences with increasing age (4–8), females report less positive  
13  
14 experiences than males (5,6) and non-white patients report less positive experiences  
15  
16 than white patients, even after adjusting for other socio-demographic variables  
17  
18 (3,5,6,9). Less is known about variation in the experiences of cancer patients. There  
19  
20 are currently 1.8 million people living with cancer in the UK (10) and advances in  
21  
22 cancer treatments mean that they are living longer and facing prolonged periods of  
23  
24 contact with healthcare services because of complex treatment regimens (11). In  
25  
26 2011, a Department of Health (DH) report set out the government's strategy to improve  
27  
28 outcomes by putting patients at the heart of cancer health services (10). A key  
29  
30 objective of this strategy was to reduce inequalities in care relating to both clinical  
31  
32 outcomes and patient experience. Thus, exploration of the experiences of cancer  
33  
34 patients and the inequalities that may exist is critical in order to identify patient groups  
35  
36 for whom cancer care services are in greatest need of improvement.  
37  
38  
39  
40  
41  
42  
43  
44  
45

46 Detailed studies on the experiences of cancer patients have often relied on small  
47  
48 sample sizes (12–14). However, a regular National Cancer Patient Experience Survey  
49  
50 (NCPES) has been established which provides a wealth of information on care and  
51  
52 treatment experiences. The 2011-12 survey includes responses from over 71,000  
53  
54 cancer patients from 160 trusts across the UK (15). With a relatively high response  
55  
56 rate and large sample size, the survey presents an opportunity to explore inequalities  
57  
58  
59  
60

1  
2 in the quality of care received by cancer patients. Here, we aim to describe the  
3  
4 variation in cancer patient experience by age, gender, ethnicity and presence of long-  
5  
6 standing conditions or disabilities in order to explore whether there are systematic  
7  
8 inequalities. We further examine the influence of clinical and trust-level factors on  
9  
10 these variations.  
11  
12

## 13 14 15 16 17 **METHODS** 18

### 19 20 **Source of data** 21

22  
23 We carried out a secondary analysis of 2011-2012 NCPES cross-sectional data  
24  
25 collected by Quality Health (Chesterfield, UK) on behalf of the DH. All patients with a  
26  
27 primary diagnosis of cancer who attended an NHS hospital as an inpatient or day case  
28  
29 between 1<sup>st</sup> September 2011 and 30<sup>th</sup> November 2011 were sent the survey (15).  
30  
31 Non-responders were followed up with two postal reminders. The final response rate  
32  
33 achieved was 68%. As no survey weights were available, the data could not be  
34  
35 weighted to adjust for non-response. The dataset included demographic and clinical  
36  
37 characteristics for 71,793 cancer patients who attended 160 hospital trusts across  
38  
39 England, as well as their responses to 70 multiple choice questions relating to various  
40  
41 aspects of their experiences of care. Surveys such as NCPES are commonly used to  
42  
43 measure patient experience over a range of domains; however, single summary  
44  
45 measures of overall experience, such as the Family and Friends Test, have become  
46  
47 increasingly important (1). Our analysis focused on a summary measure of patient  
48  
49 experience, namely patients' assessment of care as measured by Q70 in the survey,  
50  
51 "*Overall, how would you rate your care?*" Responses from a five point scale were  
52  
53 transformed into a binary outcome, with "*excellent*" and "*very good*" categorised as  
54  
55  
56  
57  
58  
59  
60

1  
2  
3  
4  
5  
6  
7  
8  
9  
10  
11  
12  
13  
14  
15  
16  
17  
18  
19  
20  
21  
22  
23  
24  
25  
26  
27  
28  
29  
30  
31  
32  
33  
34  
35  
36  
37  
38  
39  
40  
41  
42  
43  
44  
45  
46  
47  
48  
49  
50  
51  
52  
53  
54  
55  
56  
57  
58  
59  
60

'positive' and "good", "fair" and "poor" as 'not positive', in accordance with the DH Survey Guidance (15).

### **Patient, clinical and trust-level characteristics**

The main socio-demographic characteristics of interest in this study (gender, age and ethnicity) were ascertained by self-report (16) and grouped as in the national report (15). As Chinese patients have reported less positive experiences than white patients elsewhere (3,6,17), the "Chinese" ethnic category was not combined with "Other" in this analysis. For age and ethnicity the largest groups were chosen as the reference category. Responses to the question "*Do you have any of the following long-standing conditions?*" were used to identify patients with co-morbidities. The clinical characteristics of tumour group and patient status (i.e. day or inpatient) were taken from hospital administration records.

Haematological cancer patients were assigned as the reference tumour group as the largest group (breast) did not have a representative age and gender distribution. Time since first treatment was ascertained by patients' survey responses. As trust-level factors have previously been associated with patient experience (6,18–20) several were included in this analysis. Hospital trusts were categorised by type (large acute, medium acute, small acute, specialist and teaching) and by foundation status. The Care Quality Commission's (CQCs) 2008/2009 Annual Health Check rating and the proportion of frontline staff satisfied with care at their trust (Q12d from the National NHS Staff Survey 2012) were also included as measures of trusts' overall quality. Quintiles of staff satisfaction were used as a categorical variable during regression

1  
2 analysis with the lowest quintile as reference category. The reference categories  
3  
4 chosen for other trust-level factors were the largest groups.  
5  
6  
7  
8  
9

## 10 **Data analysis**

11  
12  
13 Variation in patients' overall rating of care by patient, clinical and trust-level factors was  
14 investigated using univariate logistic regression. Multivariate logistic regression was  
15 then used to describe associations between the individual demographic characteristics  
16 of interest and overall rating of care. Confounding by patient, clinical and trust-level  
17 factors was controlled for through their sequential addition to the model. Logistic  
18 regression was chosen as the small intra-class coefficient calculated for Q70 ( $<0.01$ )  
19 suggested the effect of clustering by trust among respondents was negligible;  
20 therefore, it was anticipated that a multilevel model and a multivariate logistic  
21 regression model would produce similar results (21). However, as even small intra-  
22 class correlations can inflate type-1 errors, clustered robust standard errors were  
23 utilised. Respondents with missing demographic, clinical or trust-level data, or those  
24 who did not answer Q70, were excluded (i.e. complete-case analysis was undertaken).  
25  
26 All statistical analyses were conducted in Stata V.12.  
27  
28  
29  
30  
31  
32  
33  
34  
35  
36  
37  
38  
39  
40  
41  
42  
43  
44  
45  
46  
47  
48  
49  
50  
51  
52  
53  
54  
55  
56  
57  
58  
59  
60



## RESULTS

### Patient characteristics and rating of care

A total of 71,793 patients admitted to hospital trusts across England with a primary cancer diagnosis completed the survey. Table 1 shows the demographic and clinical characteristics of respondents and Table 2 the characteristics of the hospital trusts they attended. The majority of patients were white, female and >50 years old and there were substantial numbers with disabilities or other long-standing conditions. The most common tumour groups were breast and haematological cancers. Most respondents had started their treatment in the last year and were admitted to hospital as day case patients on their most recent visit. Most were treated in large acute trusts, trusts with foundation status and trusts rated 'Good' by CQC. The majority of patients (96.5%, n=69,276) provided a response to Q70 "Overall, how would you rate your care?" In total 87.8% rated their care as "excellent" or "very good" while the remaining 12.2% rated their care "good", "fair" or "poor" (Fig.1 ).

Figure 1: Responses from NCPES 2011-12 to Q70  
"Overall, how would you rate your care?"

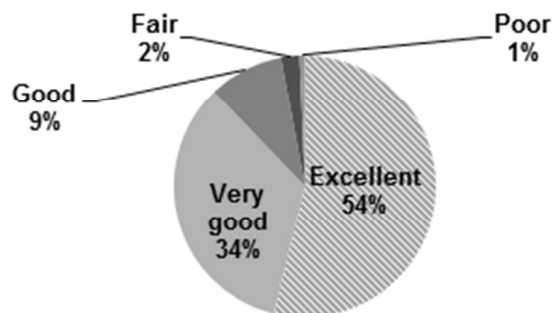

Table 1: Characteristics of survey respondents and their unadjusted associations with a positive overall rating of care from univariate logistic regression

| Patient characteristics                         |          |          |                    |                | Clinical characteristics          |          |          |                    |                |
|-------------------------------------------------|----------|----------|--------------------|----------------|-----------------------------------|----------|----------|--------------------|----------------|
|                                                 | n        | %        | OR (95% CI)        | p-value        |                                   | n        | %        | OR (95% CI)        | p-value        |
| <b>Gender</b>                                   |          |          |                    |                | <b>Tumour group</b>               |          |          |                    |                |
| Male                                            | 33,832   | 47.1     | 1 (ref)            |                | Brain/CNS                         | 746      | 1.0      | 0.52 (0.42-0.63)   | <0.001*        |
| Female                                          | 37,961   | 52.9     | 0.92 (0.88-0.96)   | <0.001*        | Breast                            | 14,739   | 20.5     | 1.00 (0.92-1.09)   | 0.98           |
|                                                 |          |          |                    |                | Colorectal / Lower GI             | 9,483    | 13.2     | 0.72 (0.66-0.78)   | <0.001*        |
| <b>Age group</b>                                | <b>n</b> | <b>%</b> | <b>OR (95% CI)</b> | <b>p-value</b> | Gynaecological                    | 4,202    | 5.9      | 0.72 (0.64-0.80)   | <0.001*        |
| 16 - 25                                         | 363      | 0.5      | 0.68 (0.51-0.92)   | 0.01*          | Haematological                    | 11,070   | 15.4     | 1 (ref)            |                |
| 26 - 35                                         | 969      | 1.4      | 0.62 (0.52-0.75)   | <0.001*        | Head and Neck                     | 2,422    | 3.4      | 0.71 (0.62-0.81)   | <0.001*        |
| 36 - 50                                         | 6,802    | 9.5      | 0.70 (0.64-0.76)   | <0.001*        | Lung                              | 5,029    | 7.0      | 0.77 (0.69-0.85)   | <0.001*        |
| 51 - 65                                         | 22,885   | 31.9     | 0.79 (0.74-0.83)   | <0.001*        | Other                             | 1,138    | 1.6      | 0.72 (0.59-0.86)   | <0.001*        |
| 66 - 75                                         | 23,643   | 32.9     | 1 (ref)            |                | Prostate                          | 5,831    | 8.1      | 0.70 (0.64-0.78)   | <0.001*        |
| 76+                                             | 17,131   | 23.9     | 0.85 (0.79-0.90)   | <0.001*        | Sarcoma                           | 2,451    | 3.4      | 0.61 (0.53-0.69)   | <0.001*        |
|                                                 |          |          |                    |                | Skin                              | 1,695    | 2.4      | 0.98 (0.82-1.16)   | 0.80           |
| <b>Ethnicity</b>                                | <b>n</b> | <b>%</b> | <b>OR (95% CI)</b> | <b>p-value</b> | Upper GI                          | 4,540    | 6.3      | 0.61 (0.55-0.68)   | <0.001*        |
| White                                           | 63,652   | 88.7     | 1 (ref)            |                | Urological                        | 8,447    | 11.8     | 0.64 (0.58-0.70)   | <0.001*        |
| Mixed                                           | 199      | 0.3      | 0.66 (0.45-0.97)   | 0.04*          | <b>Patient status</b>             | <b>n</b> | <b>%</b> | <b>OR (95% CI)</b> | <b>p-value</b> |
| Asian/Asian British                             | 1,082    | 1.5      | 0.33 (0.29-0.38)   | <0.001*        | Day case                          | 45,720   | 63.7     | 1 (ref)            |                |
| Black/Black British                             | 885      | 1.2      | 0.41 (0.35-0.49)   | <0.001*        | Inpatient                         | 26,073   | 36.3     | 0.84 (0.80-0.88)   | <0.001*        |
| Chinese                                         | 138      | 0.2      | 0.27 (0.19-0.39)   | <0.001*        |                                   |          |          |                    |                |
| Other                                           | 510      | 0.7      | 0.58 (0.46-0.73)   | <0.001*        | <b>Time since first treatment</b> | <b>n</b> | <b>%</b> | <b>OR (95% CI)</b> | <b>p-value</b> |
| <b>Long-standing conditions</b> <sup>a, b</sup> | <b>n</b> | <b>%</b> | <b>OR (95% CI)</b> | <b>p-value</b> | < 1 year                          | 44,997   | 62.3     | 1 (ref)            |                |
| None                                            | 48,218   | 67.2     |                    |                | 1-5 years                         | 17,486   | 24.4     | 0.83 (0.78-0.87)   | <0.001*        |
| Deafness/hearing impairment                     | 7,281    | 10.1     | 0.91 (0.85-0.98)   | 0.01*          | >5 years                          | 6,212    | 8.7      | 0.88 (0.81-0.95)   | 0.002*         |
| Blindness/partially sighted                     | 1,856    | 2.6      | 0.74 (0.65-0.84)   | <0.001*        |                                   |          |          |                    |                |
| Physical condition                              | 9,347    | 13.0     | 0.71 (0.67-0.76)   | <0.001*        |                                   |          |          |                    |                |
| Learning disability                             | 354      | 0.5      | 0.50 (0.39-0.65)   | <0.001*        |                                   |          |          |                    |                |
| Mental health condition                         | 1,347    | 1.9      | 0.55 (0.48-0.64)   | <0.001*        |                                   |          |          |                    |                |
| Long-standing illness <sup>c</sup>              | 9,241    | 12.9     | 0.77 (0.73-0.82)   | <0.001*        |                                   |          |          |                    |                |

Total number of respondents=71,793. Ethnicity was unknown for 7.4% respondents, long-standing conditions status for 7.3% and time since first treatment for 4.3%.

<sup>a</sup> 6.7% of patients (n=4,780) had >1 long-standing condition, therefore the column total exceeds 100%  
<sup>b</sup> Reference category for specific long-standing conditions is not having that condition  
<sup>c</sup> Such as (but not limited to) HIV, diabetes, chronic heart disease or epilepsy  
\*Significant at α=0.05 level

Table 2: Characteristics of trusts attended by survey respondents and their unadjusted associations with a positive overall rating of care from univariate logistic regression

| Trust-level characteristics                      |                                                               |             |                  |         |
|--------------------------------------------------|---------------------------------------------------------------|-------------|------------------|---------|
| Trust type                                       | n                                                             | %           | OR (95% CI)      | p-value |
| Small acute                                      | 6,240                                                         | 8.7         | 1.23 (1.12-1.34) | <0.001* |
| Medium acute                                     | 16,677                                                        | 23.2        | 1.07 (1.01-1.14) | 0.02*   |
| Large acute                                      | 25,850                                                        | 36.0        | 1 (ref)          |         |
| Specialist                                       | 3,224                                                         | 4.5         | 1.54 (1.36-1.76) | <0.001* |
| Teaching                                         | 19,802                                                        | 27.6        | 1.03 (0.98-1.10) | 0.24    |
| Foundation status                                | n                                                             | %           | OR (95% CI)      | p-value |
| No                                               | 31,798                                                        | 44.3        | 0.82 (0.78-0.85) | <0.001* |
| Yes                                              | 39,995                                                        | 55.7        | 1 (ref)          |         |
| CQC trust quality rating (2008/9)                | n                                                             | %           | OR (95% CI)      | p-value |
| Weak                                             | 3,926                                                         | 5.6         | 0.85 (0.77-0.94) | 0.001*  |
| Fair                                             | 18,482                                                        | 26.2        | 0.97 (0.92-1.03) | 0.34    |
| Good                                             | 28,425                                                        | 40.3        | 1 ref            |         |
| Excellent                                        | 19,748                                                        | 28.0        | 1.17 (1.10-1.24) | <0.001* |
| Frontline staff satisfied with care <sup>a</sup> | Quintiles of frontline staff satisfied with care <sup>b</sup> |             |                  |         |
| Mean                                             | 63.5%                                                         |             | OR (95% CI)      | p-value |
| Median                                           | 62.7%                                                         | 1 (lowest)  | 1 (ref)          |         |
| Range                                            | 35.3 - 94.0%                                                  | 2           | 1.10 (1.03-1.19) | 0.01*   |
|                                                  |                                                               | 3           | 1.11 (1.03-1.19) | 0.004*  |
|                                                  |                                                               | 4           | 1.17 (1.09-1.26) | <0.001* |
|                                                  |                                                               | 5 (highest) | 1.35 (1.25-1.45) | <0.001* |

Total number of respondents=71,793. CQC trust quality rating was unknown for 3 trusts (1.7% of respondents) and the proportion of frontline staff satisfied with care was unknown for 1 trust (1.7% of respondents)

a Calculated from responses to Q12d from the National NHS Staff Survey 2012  
b Trusts were categorised into quintiles according to the proportion of staff responding positively to Q12d  
\*Significant at  $\alpha=0.05$  level

Abbreviations: CQC=Care Quality Commission

## Variation in rating of care by patient, clinical and trust-level factors

Unadjusted associations between patient, clinical and trust-level characteristics and Q70 from univariate logistic regression analysis are shown in Tables 1 & 2. Statistically significant variation in overall rating of care by patient-level characteristics such as ethnicity, gender, age and long-standing conditions was observed. For example, women were less likely than men, and non-white patients were less likely than white patients, to rate their overall care very good or excellent. Chinese patients reported least favourably among non-white ethnic minorities. Younger and older patients were

1  
2 less likely than 66-75 year olds to rate their care very good or excellent, with the  
3  
4 youngest patients (16-24 year olds) least likely to report excellent or very good overall  
5  
6 care. Patients with any long-standing condition were less positive about their overall  
7  
8 care; those with a learning disability or mental health condition were the least satisfied.  
9

10  
11  
12  
13  
14  
15 Clinical and trust-level characteristics were also associated with overall rating of care.  
16  
17 With the exception of breast and skin cancer patients, all other patients were less likely  
18  
19 than those with haematological cancers to rate their care as very good or excellent.  
20  
21 Inpatients, patients who began their treatment more than one year ago and those who  
22  
23 attended large acute trusts, trusts without foundation status or trusts with a “weak”  
24  
25 CQC rating were also less likely to rate their care as very good or excellent.  
26  
27  
28  
29  
30  
31

### 32 **Variation in patients’ rating of care adjusting for clinical and trust-level factors**

33  
34

35 Model 1, shown in Table 3, shows the effect of mutually adjusting for all patient-level  
36  
37 factors. The observed variation in rating under univariate logistic regression was  
38  
39 mostly unaffected; negative associations between rating overall care positively and  
40  
41 being female, younger, non-white or having a long-standing condition persisted. The  
42  
43 magnitude of the associations was generally stable though there was a slight  
44  
45 attenuation in the effect of having a mental health condition or learning disability and  
46  
47 being of mixed ethnicity was no longer significantly associated. The addition of clinical  
48  
49 factors (tumour group, time since first treatment and in- or day-patient status) to the  
50  
51 regression model (Model 2) had little impact on variation by age or ethnicity, but the  
52  
53 negative association between being female and care rating increased in magnitude.  
54  
55 Including trust-level characteristics in the full multivariate model (Model 3) had a  
56  
57  
58  
59  
60

1  
2 minimal effect on the associations between patients' socio-demographic  
3 characteristics and rating of care. Even when adjusting for clinical, trust and other  
4 patient-level factors clear variation in patients' rating of care by socio-demographic  
5 characteristics such as gender, age, ethnicity and long-standing conditions was  
6 evident. Female, younger, non-White patients or patients with a long-standing  
7 condition remained less likely to rate their overall care as excellent or very good.  
8  
9  
10  
11  
12  
13  
14  
15  
16  
17  
18  
19  
20  
21  
22  
23  
24  
25  
26  
27  
28  
29  
30  
31  
32  
33  
34  
35  
36  
37  
38  
39  
40  
41  
42  
43  
44  
45  
46  
47  
48  
49  
50  
51  
52  
53  
54  
55  
56  
57  
58  
59  
60

Table 3: Association between positive rating of overall care and demographic characteristics adjusting for patient, clinical and trust-level factors

|                                              | Univariate<br>(from Table 2) |         | Model 1 <sup>a</sup>       |         | Multivariate<br>Model 2 <sup>b</sup> |         | Model 3 <sup>c</sup>       |         |
|----------------------------------------------|------------------------------|---------|----------------------------|---------|--------------------------------------|---------|----------------------------|---------|
|                                              | OR (95% CI)                  | p-value | OR <sub>adj</sub> (95% CI) | p-value | OR <sub>adj</sub> (95% CI)           | p-value | OR <sub>adj</sub> (95% CI) | p-value |
| <b>Gender</b>                                |                              |         |                            |         |                                      |         |                            |         |
| Male                                         | 1 (ref)                      |         | 1 (ref)                    |         | 1 (ref)                              |         | 1 (ref)                    |         |
| Female                                       | 0.92 (0.88-0.96)             | <0.001* | 0.94 (0.89-0.99)           | 0.02*   | 0.72 (0.68-0.77)                     | <0.001* | 0.72 (0.68-0.77)           | <0.001* |
| <b>Age group</b>                             |                              |         |                            |         |                                      |         |                            |         |
| 16 - 25                                      | 0.68 (0.51-0.92)             | 0.01*   | 0.69 (0.49-0.98)           | 0.04*   | 0.61 (0.43-0.88)                     | 0.01*   | 0.58 (0.41-0.82)           | 0.002*  |
| 26 - 35                                      | 0.62 (0.52-0.75)             | <0.001* | 0.71 (0.60-0.86)           | 0.001*  | 0.64 (0.53-0.77)                     | <0.001* | 0.62 (0.51-0.75)           | <0.001* |
| 36 - 50                                      | 0.70 (0.64-0.76)             | <0.001* | 0.72 (0.66-0.79)           | <0.001* | 0.61 (0.56-0.67)                     | <0.001* | 0.60 (0.54-0.65)           | <0.001* |
| 51 - 65                                      | 0.79 (0.74-0.83)             | <0.001* | 0.79 (0.74-0.84)           | <0.001* | 0.74 (0.69-0.78)                     | <0.001* | 0.72 (0.68-0.77)           | <0.001* |
| 66 - 75                                      | 1 (ref)                      |         | 1 (ref)                    |         | 1 (ref)                              |         | 1 (ref)                    |         |
| 76+                                          | 0.85 (0.79-0.90)             | <0.001* | 0.86 (0.80-0.93)           | <0.001* | 0.91 (0.84-0.98)                     | 0.02*   | 0.90 (0.84-0.98)           | 0.01*   |
| <b>Ethnicity</b>                             |                              |         |                            |         |                                      |         |                            |         |
| White                                        | 1 (ref)                      |         | 1 (ref)                    |         | 1 (ref)                              |         | 1 (ref)                    |         |
| Mixed                                        | 0.66 (0.45-0.97)             | 0.04*   | 0.71 (0.47-1.07)           | 0.10    | 0.66 (0.43-1.01)                     | 0.05    | 0.67 (0.43-1.04)           | 0.08    |
| Asian                                        | 0.33 (0.29-0.38)             | <0.001* | 0.35 (0.30-0.41)           | <0.001* | 0.34 (0.29-0.41)                     | <0.001* | 0.35 (0.30-0.41)           | <0.001* |
| Black                                        | 0.41 (0.35-0.49)             | <0.001* | 0.43 (0.36-0.51)           | <0.001* | 0.43 (0.35-0.52)                     | <0.001* | 0.43 (0.36-0.53)           | <0.001* |
| Chinese                                      | 0.27 (0.19-0.39)             | <0.001* | 0.29 (0.20-0.42)           | <0.001* | 0.29 (0.20-0.43)                     | <0.001* | 0.27 (0.18-0.41)           | <0.001* |
| Other                                        | 0.58 (0.46-0.73)             | <0.001* | 0.59 (0.46-0.75)           | <0.001* | 0.59 (0.47-0.75)                     | <0.001* | 0.61 (0.47-0.77)           | <0.001* |
| <b>Long-standing conditions <sup>d</sup></b> |                              |         |                            |         |                                      |         |                            |         |
| Deafness/hearing impairment                  | 0.91 (0.85-0.98)             | 0.01*   | 0.92 (0.84-0.99)           | 0.04*   | 0.93 (0.85-1.01)                     | 0.08    | 0.93 (0.85-1.01)           | 0.09    |
| Blindness/visual impairment                  | 0.74 (0.65-0.84)             | <0.001* | 0.81 (0.71-0.92)           | 0.001*  | 0.81 (0.71-0.92)                     | 0.001*  | 0.86 (0.75-0.99)           | 0.03*   |
| Physical condition                           | 0.71 (0.67-0.76)             | <0.001* | 0.73 (0.69-0.77)           | <0.001* | 0.73 (0.69-0.77)                     | <0.001* | 0.74 (0.70-0.78)           | <0.001* |
| Learning disability                          | 0.50 (0.39-0.65)             | <0.001* | 0.69 (0.52-0.91)           | 0.01*   | 0.71 (0.53-0.95)                     | 0.02*   | 0.67 (0.50-0.90)           | 0.007*  |
| Mental health condition                      | 0.55 (0.48-0.64)             | <0.001* | 0.64 (0.56-0.72)           | <0.001* | 0.64 (0.57-0.74)                     | <0.001* | 0.65 (0.57-0.74)           | <0.001* |
| Long-standing illness                        | 0.77 (0.73-0.82)             | <0.001* | 0.78 (0.73-0.84)           | <0.001* | 0.80 (0.75-0.86)                     | <0.001* | 0.81 (0.75-0.87)           | <0.001* |

Calculations based on 60,528 respondents from 150 trusts with complete data  
Abbreviations: OR=odds ratio; CI=confidence interval, ref=reference category

\*Significant at α=0.05 level with clustered robust standard errors  
<sup>a</sup> Adjusted for patient factors (i.e. ethnicity, gender, age group, specific long-standing conditions)  
<sup>b</sup> Adjusted for patient factors and clinical factors (i.e. patient status, tumour group and time since first treatment)  
<sup>c</sup> Adjusted for patient factors, clinical factors and trust-level factors (i.e. trust type, foundation status, CQC trust quality rating and quintile of frontline staff satisfied with care)  
<sup>d</sup> Reference category for specific long-standing conditions is not having that condition

## DISCUSSION

Our analysis of the 2011-2012 NCPES demonstrates that there is marked variation in the experiences of cancer patients by socio-demographic factors. Women, younger patients, ethnic minorities and patients with a long-standing condition or disability were less likely to rate their cancer care as “*excellent*” or “*very good*”. This variation remained after adjusting for clinical factors, such as tumour group and duration of treatment, and trust-level factors. This suggests that the variation by socio-demographic factors is not a result of confounding but is attributable to real differences in experiences among these groups.

To the authors’ knowledge, this was the first study to explore cancer patients’ overall rating of care by socio-demographic characteristics including longstanding-conditions or disabilities. A principal strength of this study is the large sample size (> 71,000) and the response rate of 68%, which was significantly higher than that achieved by comparable surveys (22,23). Also, as all cancer patients treated by the NHS in England during the assigned 3 month study period were sent the survey, it is likely that findings can be generalised to the wider population of cancer patients. The main limitations of this study relate to the type of data available. The data for the trust quality score was collected approximately three years prior to the NCPES survey period and so may not reflect the quality of the trust at the time of patient admission. The influence of other potentially important predictors of patient experience such as employment status (20), level of deprivation (5) and health status (2,8,24) could not be explored as these data are not gathered through the NCPES. Furthermore, the binary categorisation of patients’ responses, as per DH Survey Guidance, condenses the patients’ experiences (which were already limited to several multiple choice options) and may mask potentially significant variation.

1  
2  
3  
4 Interpretation of the findings from NCPES data requires consideration of the possible  
5 determinants of variation in patients' responses to a survey question. Firstly, it is  
6 possible that variation reflects differing health, emotional or other support needs that  
7 are not met by cancer care services (12,14,25). Secondly, differential expectations  
8 between patient groups, perhaps pertaining to socio-cultural norms, may contribute to  
9 the observed patterns (8,26). Thirdly, certain patient groups may have a tendency to  
10 respond less positively, based on shared norms regarding feedback and ideas as to its  
11 purpose (26). Finally, variation may reflect real differences in the quality of care  
12 provided (8,26).  
13  
14  
15  
16  
17  
18  
19  
20  
21  
22  
23  
24  
25

26 Studies of patient experience in the general patient population have demonstrated  
27 systematic differences in experience by gender, age and ethnicity and the results of  
28 our study further add to this knowledge by demonstrating that similar variation exists  
29 among cancer patients. Adjusting for other socio-demographic factors, women were  
30 less likely to report positive experiences than men. This may be due to the increased  
31 emotional and support needs among female cancer patients described elsewhere  
32 (13,14). Breast cancer was the most common tumour group for females (38.4%,  
33 n=14,591) and in comparison to other tumour groups breast cancer patients were  
34 more likely to rate their care positively. Notably, when clinical factors such as tumour  
35 group were adjusted for, the magnitude of the negative association between gender  
36 and overall care rating increased. This may indicate that while patient experience  
37 varies modestly overall by gender there are marked differences between men and  
38 women with less common cancers. This is an area which merits further exploration.  
39  
40  
41  
42  
43  
44  
45  
46  
47  
48  
49  
50  
51  
52  
53  
54  
55  
56  
57  
58  
59  
60



1  
2 Younger patients were less likely to report positive experiences than older patients,  
3 which corroborates previous findings in relation to age and patient satisfaction (4–8,13,  
4 27). It has been suggested that this observation may reflect a generational  
5 phenomenon, whereby older patients' responses are influenced by comparisons with  
6 their parents' generation who may not have had access to advanced technologies of  
7 modern treatment or the free care provided by the NHS, referred to as 'gratitude bias'  
8 (28,29). Alternatively, younger patients may have higher expectations of quality of care  
9 due to a reduced frequency of hospital visits compared to older patients (17). The  
10 poorer rating of care in the oldest age group (76+ years) fits with neither theory and  
11 further work to understand the cause of the variation in cancer patient experience by  
12 age is required.  
13  
14  
15  
16  
17  
18  
19  
20  
21  
22  
23  
24  
25  
26  
27

28  
29 Ethnic minorities, especially Asian and specifically Chinese patients, reported less  
30 positive experiences than white patients. This trend is similar to findings from previous  
31 studies exploring variation in patient experiences of care generally (2,4,5) and  
32 specifically for cancer (17,22). The extent to which these results are due to cultural  
33 differences in expectations of care or willingness to criticise is unclear and  
34 necessitates further research. Of significant concern is the possibility that these  
35 patients experience poorer quality of care owing to a lack of understanding of the care  
36 needs of these minority groups or to discrimination, unintended or otherwise (8).  
37  
38  
39  
40  
41  
42  
43  
44  
45  
46  
47  
48

49 Patients with various long-standing conditions reported significantly less positive  
50 patient experiences than those without. The worst experiences were reported by  
51 patients with a learning disability or mental health condition. Given the small numbers  
52 of patients in these groups and the strength of the association it seems likely that there  
53 is marked variation in their experiences compared to other patients. Patients with long-  
54  
55  
56  
57  
58  
59  
60

1  
2 standing illnesses such as diabetes and chronic heart disease were also less likely to  
3  
4 rate their care as “excellent” or “very good.” Given that the number of patients with  
5  
6 such illnesses is set to rise in the future with an ageing patient population it is  
7  
8 important to explore how having co-morbidities influences patients’ experience of  
9  
10 cancer care.  
11

12  
13  
14  
15 This study presents evidence of inequalities in experiences of cancer care by gender,  
16  
17 age, ethnicity and disability. Whilst it is possible that some of the variation observed  
18  
19 between patient groups is a result of varying socio-cultural expectations or tendencies  
20  
21 to rate care positively, it is also possible that the quality of care truly differs between  
22  
23 patient groups. Further investigation of the experiences of women, ethnic minorities,  
24  
25 younger patients and those with a disability is needed so that cancer care services can  
26  
27 be better tailored to meet the needs and expectations of these groups. Analysis of the  
28  
29 NCPES qualitative free text questions and other patient experience data at a trust level  
30  
31 would help to inform quality improvement initiatives. The findings of this study would  
32  
33 appear to suggest that, if used as a comparative performance indicator (as is NCPES  
34  
35 data) patient experience measures should be adjusted for age, gender and ethnicity.  
36  
37 An unadjusted measure of performance could unfairly disadvantage hospital trusts  
38  
39 with higher than average proportion of ethnic minority patients, for example. However,  
40  
41 the impact of adjusting NCPES data for demographic characteristics on trust rankings  
42  
43 has been shown to be minimal (30). Adjusting for gender, age and ethnicity causes  
44  
45 few trusts to move into or out of the top or bottom 20% of trusts nationally. While they  
46  
47 may not account for much of the between-trust variation in cancer patient experience  
48  
49 the overall variation in patient experience by demographic factors is important in its  
50  
51 own right and warrants further attention.  
52  
53  
54  
55  
56  
57  
58  
59  
60

1  
2 Responses to survey questions are a result of patients' perception and interpretation of  
3  
4 events, which are shaped by expectations and clinical or emotional needs, in addition  
5  
6 to the quality of services received. Meeting the care needs of all patients equally is a  
7  
8 fundamental principle of the NHS and high-quality cancer services must strive to meet  
9  
10 the needs of its diverse patient population. This study identifies patient groups for  
11  
12 which cancer care services are in greatest need of improvement.  
13  
14  
15  
16  
17  
18  
19  
20  
21  
22

### 23 **KEY MESSAGES (3-4 sentences less than 25 words each)**

- 24  
25 • Adjusting for clinical and trust-level factors, there is evidence of inequalities in  
26  
27 patients' experiences of cancer care by socio-demographic characteristics.  
28
- 29  
30 • Female, younger and non-white (especially Asian) cancer patients are less  
31  
32 likely to rate their overall care as excellent or very good.  
33
- 34  
35 • Patients with a long-standing condition also report poorer overall care, patients  
36  
37 with a learning disability or mental health condition being least satisfied.  
38
- 39  
40 • While patient experience varies modestly overall by gender, there may be  
41  
42 marked differences between the experiences of men and women with less  
43  
44 common cancers.  
45  
46  
47  
48  
49  
50  
51  
52  
53  
54  
55  
56  
57  
58  
59  
60

**LICENCE FOR PUBLICATION STATEMENT**

The Corresponding Author has the right to grant on behalf of all authors and does grant on behalf of all authors, an exclusive licence (or non-exclusive for government employees) on a worldwide basis to the BMJ Group and co-owners or contracting owning societies (where published by the BMJ Group on their behalf), and its Licensees to permit this article (if accepted) to be published in Sexually Transmitted Infections and any other BMJ Group products and to exploit all subsidiary rights, as set out in our licence <http://group.bmj.com/products/journals/instructions-for-authors/licence-forms>.

**Acknowledgements:** None

**Contributorship statement:** HW devised the study, advised on data analysis and participated in interpreting the data and reviewing the manuscript; SD participated in interpreting the data and reviewing the manuscript; LM carried out supplementary data analysis, participated in interpreting the data and co-prepared the manuscript; AB carried out the statistical analysis, interpreted the data and co-prepared the manuscript.

**Funding:** There was no specific funding for this project. HW, SD and LM are supported by the NIHR Imperial College Healthcare NHS Trust Biomedical Research Centre and Imperial College Healthcare Charity.

**Competing interests:** None

**Ethics:** No ethical approval was required for this study

**Data sharing:** The National Cancer Patient Experience Survey 2012-13 dataset used is available for download from <http://ukdataservice.ac.uk>.

## REFERENCES

1. NHS England. Putting patients first: The NHS England business plan for 2013/14 – 2015/16. 2012 p. 1–64.
2. Healthcare Commission. Variations in the experiences of patients in England: Analysis of the Healthcare Commission's 2003/2004 national surveys of patients. London; 2005 p. 1–35.
3. Department of Health. Report on the self reported experience of patients from black and minority ethnic groups. London; 2009 p. 1–31.
4. Campbell JL, Ramsay J, Green J. Age, gender, socioeconomic, and ethnic differences in patients' assessments of primary health care. *Qual Health Care* 2001;**10**(2):90–5.
5. Commission for Health Improvement. Unpacking the patients' perspective: Variations in NHS patient experience in England. London; 2004 p. 1–112.
6. Sizmur S. Multilevel analysis of inpatient experience. Picker Institute Europe. 2011 p. 1–28.

- 1  
2  
3  
4  
5  
6  
7  
8  
9  
10  
11  
12  
13  
14  
15  
16  
17  
18  
19  
20  
21  
22  
23  
24  
25  
26  
27  
28  
29  
30  
31  
32  
33  
34  
35  
36  
37  
38  
39  
40  
41  
42  
43  
44  
45  
46  
47  
48  
49  
50  
51  
52  
53  
54  
55  
56  
57  
58  
59  
60
7. Jenkinson C, Coulter A, Bruster S, et al. Patients' experiences and satisfaction with health care: results of a questionnaire study of specific aspects of care. *Qual Saf Health Care* 2002;**11**(4):335–9.
8. Lyratzopoulos G, Elliott M, Barbiere JM, et al. Understanding ethnic and other socio-demographic differences in patient experience of primary care: evidence from the English General Practice Patient Survey. *BMJ Qual Saf* 2012;**21**(1):21–9.
9. Mead N, Roland M. Understanding why some ethnic minority patients evaluate medical care more negatively than white patients: a cross sectional analysis of a routine patient survey in English general practices. *BMJ* 2009;**339**:b3450.
10. Department of Health. Improving Outcomes: A Strategy for Cancer. 2011 p. 1–99.
11. Davidson R, Mills ME. Cancer patients' satisfaction with communication, information and quality of care in a UK region. *Eur J Cancer Care (Engl)* 2005;**14**(1):83–90.
12. Cox A, Jenkins V, Catt S, et al. Information needs and experiences: an audit of UK cancer patients. *Eur J Oncol Nurs* 2006;**10**(4):263–72.
13. Clarke S, Booth L, Velikova G, et al. Social support: gender differences in cancer patients in the United Kingdom. *Cancer Nurs* 2006;**29**(1):66–72.
14. Morrison V, Henderson BJ, Zinovieff F, et al. Common, important, and unmet needs of cancer outpatients. *Eur J Oncol Nurs* 2012;**16**:115–23.

- 1  
2  
3  
4  
5  
6  
7  
8  
9  
10  
11  
12  
13  
14  
15  
16  
17  
18  
19  
20  
21  
22  
23  
24  
25  
26  
27  
28  
29  
30  
31  
32  
33  
34  
35  
36  
37  
38  
39  
40  
41  
42  
43  
44  
45  
46  
47  
48  
49  
50  
51  
52  
53  
54  
55  
56  
57  
58  
59  
60
15. Department of Health. Cancer Patient Experience Survey 2011/12: National Report. 2011 p. 1–168.
16. Saunders CL, Abel GA, El Turabi A, et al. Accuracy of routinely recorded ethnic group information compared with self-reported ethnicity: evidence from the English Cancer Patient Experience Survey. *BMJ Open*. 2013;**3**(6):1–9.
17. El Turabi A, Abel GA, Roland M, et al. Variation in reported experience of involvement in cancer treatment decision making: evidence from the National Cancer Patient Experience Survey. *Br J Cancer* 2013;**109**(3):780–7.
18. Ipsos MORI. Frontiers of performance in the NHS II. 2008 p. 1–100.
19. Raleigh VS, Frosini F, Sizmur S, et al. Do some trusts deliver a consistently better experience for patients? An analysis of patient experience across acute care surveys in English NHS trusts. *BMJ Qual Saf* 2012;**21**(5):381–90.
20. Kontopantelis E, Roland M, Reeves D. Patient experience of access to primary care: identification of predictors in a national patient survey. *BMC Fam Pract* 2010;**11**(61):1–15.
21. Kreft IG, de Leeuw J. *Introducing Multilevel Modeling*. London: SAGE Publications; 2002.
22. Lyratzopoulos G, Neal RD, Barbiere JM, et al. Variation in number of general practitioner consultations before hospital referral for cancer: findings from the 2010 National Cancer Patient Experience Survey in England. *Lancet Oncol* 2012;**13**(4):353–65.

- 1
  - 2
  - 3
  - 4
  - 5
  - 6
  - 7
  - 8
  - 9
  - 10
  - 11
  - 12
  - 13
  - 14
  - 15
  - 16
  - 17
  - 18
  - 19
  - 20
  - 21
  - 22
  - 23
  - 24
  - 25
  - 26
  - 27
  - 28
  - 29
  - 30
  - 31
  - 32
  - 33
  - 34
  - 35
  - 36
  - 37
  - 38
  - 39
  - 40
  - 41
  - 42
  - 43
  - 44
  - 45
  - 46
  - 47
  - 48
  - 49
  - 50
  - 51
  - 52
  - 53
  - 54
  - 55
  - 56
  - 57
  - 58
  - 59
  - 60
23. Care Quality Commission. National NHS patient survey programme: Survey of adult inpatients 2012. 2013 p. 1–34.
24. Cohen G. Age and health status in a patient satisfaction survey. *Soc Sci Med* 1996;**42**(7):1085–93.
25. Pinquart M, Duberstein PR. Information needs and decision-making processes in older cancer patients. *Crit Rev Oncol Hematol* 2004;**51**(1):69–80.
26. Perneger T. Adjustment for patient characteristics in satisfaction surveys. *Int J Qual Heal Care* 2004;**16**(6):433–5.
27. Crow R, Gage H, Hampson S, et al. The measurement of satisfaction practice from a systematic review. *Health Technol Assess* 2002;**6**(32):1–250.
28. Department of Health. Methods, reasoning and scope: Statement of methodology for the overall patient experience scores. 2013 p. 1–28.
29. Bowling A. An “inverse satisfaction law”? Why don’t older patients criticise health services? *J Epidemiol Community Health* 2002;**56**(7):482.
30. Saunders K, Lyratzopoulos G, Abel G. Is case-mix adjustment important for the National Cancer Patient Experience Survey in England? Cambridge Centre for Health Services Research; 2013 p. 1–12.



1  
2  
3  
4  
5  
6  
7  
8  
9  
10  
11  
12  
13  
14  
15  
16  
17  
18  
19  
20  
21  
22  
23  
24  
25  
26  
27  
28  
29  
30  
31  
32  
33  
34  
35  
36  
37  
38  
39  
40  
41  
42  
43  
44  
45  
46  
47  
48  
49  
50  
51  
52  
53  
54  
55  
56  
57  
58  
59  
60

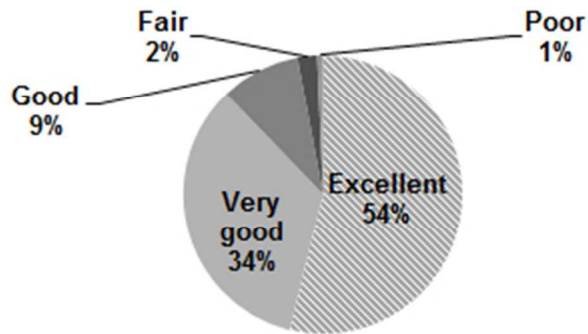

peer review only

1  
2  
3  
4  
5  
6  
7  
8  
9  
10  
11  
12  
13  
14  
15  
16  
17  
18  
19  
20  
21  
22  
23  
24  
25  
26  
27  
28  
29  
30  
31  
32  
33  
34  
35  
36  
37  
38  
39  
40  
41  
42  
43  
44  
45  
46  
47  
48  
49

STROBE Statement—Checklist of items that should be included in reports of *cross-sectional studies*

|                          | Item No | Recommendation                                                                                                                                                                                    |     | Note                         |
|--------------------------|---------|---------------------------------------------------------------------------------------------------------------------------------------------------------------------------------------------------|-----|------------------------------|
| Title and abstract       | 1       | (a) Indicate the study’s design with a commonly used term in the title or the abstract                                                                                                            | ✓   |                              |
|                          |         | (b) Provide in the abstract an informative and balanced summary of what was done and what was found                                                                                               | ✓   |                              |
| <b>Introduction</b>      |         |                                                                                                                                                                                                   |     |                              |
| Background/rationale     | 2       | Explain the scientific background and rationale for the investigation being reported                                                                                                              | ✓   |                              |
| Objectives               | 3       | State specific objectives, including any pre-specified hypotheses                                                                                                                                 | ✓   |                              |
| <b>Methods</b>           |         |                                                                                                                                                                                                   |     |                              |
| Study design             | 4       | Present key elements of study design early in the paper                                                                                                                                           | ✓   |                              |
| Setting                  | 5       | Describe the setting, locations, and relevant dates, including periods of recruitment, exposure, follow-up, and data collection                                                                   | ✓   |                              |
| Participants             | 6       | (a) Give the eligibility criteria, and the sources and methods of selection of participants                                                                                                       | ✓   |                              |
| Variables                | 7       | Clearly define all outcomes, exposures, predictors, potential confounders, and effect modifiers. Give diagnostic criteria, if applicable                                                          | ✓   |                              |
| Data sources/measurement | 8*      | For each variable of interest, give sources of data and details of methods of assessment (measurement). Describe comparability of assessment methods if there is more than one group              | ✓   |                              |
| Bias                     | 9       | Describe any efforts to address potential sources of bias                                                                                                                                         | N/A | No weights available         |
| Study size               | 10      | Explain how the study size was arrived at                                                                                                                                                         | N/A | Response rate described      |
| Quantitative variables   | 11      | Explain how quantitative variables were handled in the analyses.                                                                                                                                  | ✓   |                              |
|                          |         | If applicable, describe which groupings were chosen and why                                                                                                                                       | ✓   |                              |
| Statistical methods      | 12      | (a) Describe all statistical methods, including those used to control for confounding                                                                                                             | ✓   |                              |
|                          |         | (b) Describe any methods used to examine subgroups and interactions                                                                                                                               | N/A | No sub-analyses done         |
|                          |         | (c) Explain how missing data were addressed                                                                                                                                                       | ✓   |                              |
|                          |         | (d) If applicable, describe analytical methods taking account of sampling strategy                                                                                                                | ✓   |                              |
|                          |         | (e) Describe any sensitivity analyses                                                                                                                                                             | N/A | No sensitivity analyses done |
| <b>Results</b>           |         |                                                                                                                                                                                                   |     |                              |
| Participants             | 13*     | (a) Report numbers of individuals at each stage of study—eg numbers potentially eligible, examined for eligibility, confirmed eligible, included in the study, completing follow-up, and analysed | ✓   |                              |

|                          |     |                                                                                                                                                                                                              |     |  |
|--------------------------|-----|--------------------------------------------------------------------------------------------------------------------------------------------------------------------------------------------------------------|-----|--|
|                          |     | (b) Give reasons for non-participation at each stage                                                                                                                                                         | N/A |  |
|                          |     | (c) Consider use of a flow diagram                                                                                                                                                                           | N/A |  |
| Descriptive data         | 14* | (a) Give characteristics of study participants (eg demographic, clinical, social) and information on exposures and potential confounders                                                                     | ✓   |  |
|                          |     | (b) Indicate number of participants with missing data for each variable of interest                                                                                                                          | ✓   |  |
| Outcome data             | 15* | Report numbers of outcome events or summary measures                                                                                                                                                         | ✓   |  |
| Main results             | 16  | (a) Give unadjusted estimates and, if applicable, confounder-adjusted estimates and their precision (eg, 95% confidence interval). Make clear which confounders were adjusted for and why they were included | ✓   |  |
|                          |     | (b) Report category boundaries when continuous variables were categorized                                                                                                                                    | ✓   |  |
|                          |     | (c) If relevant, consider translating estimates of relative risk into absolute risk for a meaningful time period                                                                                             | N/A |  |
| Other analyses           | 17  | Report other analyses done—eg analyses of subgroups and interactions, and sensitivity analyses                                                                                                               | N/A |  |
| <b>Discussion</b>        |     |                                                                                                                                                                                                              |     |  |
| Key results              | 18  | Summarise key results with reference to study objectives                                                                                                                                                     | ✓   |  |
| Limitations              | 19  | Discuss limitations of the study, taking into account sources of potential bias or imprecision. Discuss both direction and magnitude of any potential bias                                                   | ✓   |  |
| Interpretation           | 20  | Give a cautious overall interpretation of results considering objectives, limitations, multiplicity of analyses, results from similar studies, and other relevant evidence                                   | ✓   |  |
| Generalisability         | 21  | Discuss the generalisability (external validity) of the study results                                                                                                                                        | ✓   |  |
| <b>Other information</b> |     |                                                                                                                                                                                                              |     |  |
| Funding                  | 22  | Give the source of funding and the role of the funders for the present study and, if applicable, for the original study on which the present article is based                                                | ✓   |  |

\*Give information separately for exposed and unexposed groups.

**Note:** An Explanation and Elaboration article discusses each checklist item and gives methodological background and published examples of transparent reporting. The STROBE checklist is best used in conjunction with this article (freely available on the Web sites of PLoS Medicine at <http://www.plosmedicine.org/>, Annals of Internal Medicine at <http://www.annals.org/>, and Epidemiology at <http://www.epidem.com/>). Information on the STROBE Initiative is available at [www.strobe-statement.org](http://www.strobe-statement.org).



**Inequalities in cancer patients' experiences of care: analysis of data from the National Cancer Patient Experience Survey 2011-12**

|                                 |                                                                                                                                                                                                                                                                                                                                                                                       |
|---------------------------------|---------------------------------------------------------------------------------------------------------------------------------------------------------------------------------------------------------------------------------------------------------------------------------------------------------------------------------------------------------------------------------------|
| Journal:                        | <i>BMJ Open</i>                                                                                                                                                                                                                                                                                                                                                                       |
| Manuscript ID:                  | bmjopen-2013-004567.R1                                                                                                                                                                                                                                                                                                                                                                |
| Article Type:                   | Research                                                                                                                                                                                                                                                                                                                                                                              |
| Date Submitted by the Author:   | 09-Jan-2014                                                                                                                                                                                                                                                                                                                                                                           |
| Complete List of Authors:       | Bone, Anna; Imperial College London, School of Public Health<br>Mc Grath-Lone, Louise; Imperial College London, Patient Experience Research Centre, School of Public Health<br>Day, Sophie; Imperial College London, Patient Experience Research Centre, School of Public Health<br>Ward, Helen; Imperial College London, Patient Experience Research Centre, School of Public Health |
| <b>Primary Subject Heading</b>: | Public health                                                                                                                                                                                                                                                                                                                                                                         |
| Secondary Subject Heading:      | Oncology                                                                                                                                                                                                                                                                                                                                                                              |
| Keywords:                       | PUBLIC HEALTH, ONCOLOGY, Adult oncology < ONCOLOGY                                                                                                                                                                                                                                                                                                                                    |
|                                 |                                                                                                                                                                                                                                                                                                                                                                                       |

SCHOLARONE™  
Manuscripts

1  
2  
3  
4  
5  
6  
7  
8  
9  
10  
11  
12  
13  
14  
15  
16  
17  
18  
19  
20  
21  
22  
23  
24  
25  
26  
27  
28  
29  
30  
31  
32  
33  
34  
35  
36  
37  
38  
39  
40  
41  
42  
43  
44  
45  
46  
47  
48  
49  
50  
51  
52  
53  
54  
55  
56  
57  
58  
59  
60

# Inequalities in cancer patients' experiences of care: analysis of data from the National Cancer Patient Experience Survey 2011-12

**Corresponding author:** Louise Mc Grath-Lone, Patient Experience Research Centre, School of Public Health, Imperial College London, W2 1PG, UK.

E-mail: Louise.mc-grath-lone@imperial.ac.uk

Phone: 0207 5943417

Fax: 0207 4023927

**Authors:** Anna Bone<sup>1</sup>, Louise Mc Grath-Lone<sup>2</sup>, Sophie Day<sup>2</sup>, Helen Ward.<sup>2</sup>

**Affiliations:**

1. School of Public Health, Imperial College London, W2 1PG, UK.
2. Patient Experience Research Centre, School of Public Health, Imperial College, London, W2 1PG, UK.

**Keywords:** Patient satisfaction, quality measurement, surveys

**Word count:** 2,912

## ABSTRACT

### Background

Patient experience is a key component of quality in healthcare; however, studies in the UK indicate that patients' experience of care is not equal across gender, age and ethnicity. There are currently 1.8 million people living with cancer in the UK but less is known about their experiences of care. Whether inequalities by socio-demographic characteristics exist amongst cancer patients is not well-documented.

### Methods

Using cross-sectional data from 71,793 cancer patients who completed the National Cancer Patient Experience Survey 2011-2012, we examined associations between patient, clinical and trust-level factors and a summary measure of patient experience, namely overall rating of care. Multivariate logistic regression was used to investigate variation by socio-demographic characteristics adjusting for other patient, clinical and trust-level factors.

### Results

Female, non-white and younger patients were less likely to rate their overall care as excellent or very good. Patients with long-standing conditions, particularly those with learning disabilities or mental health conditions also reported poorer overall care. This variation persisted when other patient, clinical and trust-level factors were controlled

1  
2 for, indicating there are real differences in experiences among cancer patients by  
3  
4 socio-demographic characteristics.  
5  
6  
7  
8

## 9 10 **Conclusion**

11  
12 There is evidence of inequalities in cancer patient experience in the UK by socio-  
13 demographic characteristics such as gender, age, ethnicity and disability. Quality  
14 cancer care services must strive to meet the needs of a diverse patient population  
15 equally; this study identifies patient groups for whom it appears cancer care services  
16 are in greatest need of improvement.  
17  
18  
19  
20  
21  
22  
23  
24  
25  
26  
27

## 28 **Article summary: Strengths and limitations of this study**

- 29  
30  
31
- 32 • To the authors' knowledge, this is the first study to explore cancer patients'  
33 overall rating of care by socio-demographic characteristics including  
34 longstanding-conditions or disabilities.  
35  
36
  - 37 • A principal strength of this study is the large sample size (> 71,000) and high  
38 response rate (68%).  
39  
40
  - 41 • As this study involves secondary analysis of national survey data it is limited by  
42 the type of data available e.g. the influence of potentially important predictors of  
43 patient experience such as employment status, level of deprivation and health  
44 status could not be explored as these data were not gathered.  
45  
46  
47  
48
  - 49 • A further limitation is that the binary categorisation of patients' responses  
50 condenses the patients' experiences (which were already limited to several  
51 multiple choice options) and may mask potentially significant variation.  
52  
53  
54  
55  
56  
57  
58  
59  
60

## INTRODUCTION

1  
2  
3  
4 Patient experience is a key component of quality in healthcare and is one of the top  
5  
6 priorities in the NHS (1). However, studies in the UK indicate that there are systematic  
7  
8 differences in patient experience by socio-demographic characteristics (2–4). For  
9  
10 example, studies on primary and hospital care have found that patients tend to report  
11  
12 more positive experiences with increasing age (4–8), females report less positive  
13  
14 experiences than males (5,6) and non-white patients report less positive experiences  
15  
16 than white patients, even after adjusting for other socio-demographic variables  
17  
18 (3,5,6,9). Less is known about variation in the experiences of cancer patients. There  
19  
20 are currently 1.8 million people living with cancer in the UK (10) and advances in  
21  
22 cancer treatments mean that they are living longer and facing prolonged periods of  
23  
24 contact with healthcare services because of complex treatment regimens (11). In  
25  
26 2011, a Department of Health (DH) report set out the government's strategy to improve  
27  
28 outcomes by putting patients at the heart of cancer health services (10). A key  
29  
30 objective of this strategy was to reduce inequalities in care relating to both clinical  
31  
32 outcomes and patient experience. Thus, exploration of the experiences of cancer  
33  
34 patients and the inequalities that may exist is critical in order to identify patient groups  
35  
36 for whom cancer care services are in greatest need of improvement.  
37  
38  
39  
40  
41  
42  
43  
44  
45

46 Detailed studies on the experiences of cancer patients have often relied on small  
47  
48 sample sizes (12–14). However, a regular National Cancer Patient Experience Survey  
49  
50 (NCPES) has been established which provides a wealth of information on care and  
51  
52 treatment experiences. The 2011-12 survey includes responses from over 71,000  
53  
54 cancer patients from 160 trusts across the UK (15). With a relatively high response  
55  
56 rate and large sample size, the survey presents an opportunity to explore inequalities  
57  
58  
59  
60



1  
2 in the quality of care received by cancer patients. Here, we aim to describe the  
3  
4 variation in cancer patient experience by age, gender, ethnicity and presence of long-  
5  
6 standing conditions or disabilities in order to explore whether there are systematic  
7  
8 inequalities. We further examine the influence of clinical and trust-level factors on  
9  
10 these variations.  
11  
12  
13

## 14 15 16 17 **METHODS** 18

### 19 20 21 **Source of data** 22

23  
24 We carried out a secondary analysis of 2011-2012 NCPES cross-sectional data  
25  
26 collected by Quality Health (Chesterfield, UK) on behalf of the DH. All patients with a  
27  
28 primary diagnosis of cancer who attended an NHS hospital as an inpatient or day case  
29  
30 between 1<sup>st</sup> September 2011 and 30<sup>th</sup> November 2011 were sent the survey (15).  
31  
32 Non-responders were followed up with two postal reminders. The final response rate  
33  
34 achieved was 68%. As no survey weights were available, the data could not be  
35  
36 weighted to adjust for non-response. The dataset included demographic and clinical  
37  
38 characteristics for 71,793 cancer patients who attended 160 hospital trusts across  
39  
40 England, as well as their responses to 70 multiple choice questions relating to various  
41  
42 aspects of their experiences of care. Surveys such as NCPES are commonly used to  
43  
44 measure patient experience over a range of domains; however, single summary  
45  
46 measures of overall experience, such as the Family and Friends Test, have become  
47  
48 increasingly important (1). Our analysis focused on a summary measure of patient  
49  
50 experience, namely patients' assessment of care as measured by Q70 in the survey,  
51  
52 "*Overall, how would you rate your care?*" Responses from a five point scale were  
53  
54 transformed into a binary outcome, with "*excellent*" and "*very good*" categorised as  
55  
56  
57  
58  
59  
60

1  
2 'positive' and "good", "fair" and "poor" as 'not positive', in accordance with the DH  
3  
4 Survey Guidance (15).  
5  
6  
7  
8  
9

### 10 **Patient, clinical and trust-level characteristics**

11  
12  
13 The main socio-demographic characteristics of interest in this study (gender, age and  
14 ethnicity) were ascertained by self-report (16) and grouped as in the national report  
15 (15). As Chinese patients have reported less positive experiences than white patients  
16 elsewhere (3,6,17), the "Chinese" ethnic category was not combined with "Other" in  
17 this analysis. For age and ethnicity the largest groups were chosen as the reference  
18 category. Responses to the question "*Do you have any of the following long-standing*  
19 *conditions?*" were used to identify patients with co-morbidities. The clinical  
20 characteristics of tumour group and patient status (i.e. day or inpatient) were taken  
21 from hospital administration records.  
22  
23  
24  
25  
26  
27  
28  
29  
30  
31  
32  
33  
34  
35  
36

37 Haematological cancer patients were assigned as the reference tumour group as the  
38 largest group (breast) did not have a representative age and gender distribution. Time  
39 since first treatment was ascertained by patients' survey responses. As trust-level  
40 factors have previously been associated with patient experience (6,18–20) several  
41 were included in this analysis. Hospital trusts were categorised by type (large acute,  
42 medium acute, small acute, specialist and teaching) and by foundation status. The  
43 Care Quality Commission's (CQCs) 2008/2009 Annual Health Check rating and the  
44 proportion of frontline staff satisfied with care at their trust (Q12d from the National  
45 NHS Staff Survey 2012) were also included as measures of trusts' overall quality.  
46  
47  
48  
49  
50  
51  
52  
53  
54  
55  
56  
57  
58  
59  
60 Quintiles of staff satisfaction were used as a categorical variable during regression

1  
2 analysis with the lowest quintile as reference category. The reference categories  
3  
4 chosen for other trust-level factors were the largest groups.  
5  
6  
7  
8  
9

## 10 **Data analysis**

11  
12  
13 Variation in patients' overall rating of care by patient, clinical and trust-level factors was  
14 investigated using univariate logistic regression. Respondents with missing  
15 demographic, clinical or trust-level data, or those who did not answer Q70, were then  
16 excluded (i.e. complete-case analysis was undertaken) and multivariate logistic  
17 regression was used to describe associations between the individual demographic  
18 characteristics of interest and overall rating of care. Confounding by patient, clinical  
19 and trust-level factors was controlled for through their sequential addition to the model.  
20  
21 Logistic regression was chosen as the small intra-class coefficient calculated for Q70  
22 ( $<0.01$ ) suggested the effect of clustering by trust among respondents was negligible;  
23 therefore, it was anticipated that a multilevel model and a multivariate logistic  
24 regression model would produce similar results (21). However, as even small intra-  
25 class correlations can inflate type-1 errors, clustered robust standard errors were  
26 utilised. All statistical analyses were conducted in Stata V.12.  
27  
28  
29  
30  
31  
32  
33  
34  
35  
36  
37  
38  
39  
40  
41  
42  
43  
44  
45  
46  
47  
48  
49  
50  
51  
52  
53  
54  
55  
56  
57  
58  
59  
60

## RESULTS

### Patient characteristics and rating of care

A total of 71,793 patients admitted to hospital trusts across England with a primary cancer diagnosis completed the survey. Table 1 shows the demographic and clinical characteristics of respondents and Table 2 the characteristics of the hospital trusts they attended. The majority of patients were white, female and >50 years old and there were substantial numbers with disabilities or other long-standing conditions. The most common tumour groups were breast and haematological cancers. Most respondents had started their treatment in the last year and were admitted to hospital as day case patients on their most recent visit. Most were treated in large acute trusts, trusts with foundation status and trusts rated 'Good' by CQC. The majority of patients (96.5%, n=69,276) provided a response to Q70 "Overall, how would you rate your care?" In total 87.8% rated their care as "excellent" or "very good" while the remaining 12.2% rated their care "good", "fair" or "poor" (Fig.1 ).

Table 1: Characteristics of survey respondents and their unadjusted associations with a positive overall rating of care from univariate logistic regression

| Patient characteristics                         |        |      |                  |                  | Clinical characteristics          |        |      |                  |                  |
|-------------------------------------------------|--------|------|------------------|------------------|-----------------------------------|--------|------|------------------|------------------|
|                                                 | n      | %    | OR (95% CI)      | p-value          |                                   | n      | %    | OR (95% CI)      | p-value          |
| <b>Gender</b>                                   |        |      |                  |                  | <b>Tumour group</b>               |        |      |                  |                  |
| Male                                            | 33,832 | 47.1 | 1 (ref)          |                  | Brain/CNS                         | 746    | 1.0  | 0.52 (0.42-0.63) | <b>&lt;0.001</b> |
| Female                                          | 37,961 | 52.9 | 0.92 (0.88-0.96) | <b>&lt;0.001</b> | Breast                            | 14,739 | 20.5 | 1.00 (0.92-1.09) | 0.98             |
|                                                 |        |      |                  |                  | Colorectal / Lower GI             | 9,483  | 13.2 | 0.72 (0.66-0.78) | <b>&lt;0.001</b> |
| <b>Age group</b>                                |        |      |                  |                  | Gynaecological                    | 4,202  | 5.9  | 0.72 (0.64-0.80) | <b>&lt;0.001</b> |
| 16 - 25                                         | 363    | 0.5  | 0.68 (0.51-0.92) | <b>0.01</b>      | Haematological                    | 11,070 | 15.4 | 1 (ref)          |                  |
| 26 - 35                                         | 969    | 1.4  | 0.62 (0.52-0.75) | <b>&lt;0.001</b> | Head and Neck                     | 2,422  | 3.4  | 0.71 (0.62-0.81) | <b>&lt;0.001</b> |
| 36 - 50                                         | 6,802  | 9.5  | 0.70 (0.64-0.76) | <b>&lt;0.001</b> | Lung                              | 5,029  | 7.0  | 0.77 (0.69-0.85) | <b>&lt;0.001</b> |
| 51 - 65                                         | 22,885 | 31.9 | 0.79 (0.74-0.83) | <b>&lt;0.001</b> | Other                             | 1,138  | 1.6  | 0.72 (0.59-0.86) | <b>&lt;0.001</b> |
| 66 - 75                                         | 23,643 | 32.9 | 1 (ref)          |                  | Prostate                          | 5,831  | 8.1  | 0.70 (0.64-0.78) | <b>&lt;0.001</b> |
| 76+                                             | 17,131 | 23.9 | 0.85 (0.79-0.90) | <b>&lt;0.001</b> | Sarcoma                           | 2,451  | 3.4  | 0.61 (0.53-0.69) | <b>&lt;0.001</b> |
|                                                 |        |      |                  |                  | Skin                              | 1,695  | 2.4  | 0.98 (0.82-1.16) | 0.80             |
| <b>Ethnicity</b>                                |        |      |                  |                  | Upper GI                          | 4,540  | 6.3  | 0.61 (0.55-0.68) | <b>&lt;0.001</b> |
| White                                           | 63,652 | 88.7 | 1 (ref)          |                  | Urological                        | 8,447  | 11.8 | 0.64 (0.58-0.70) | <b>&lt;0.001</b> |
| Mixed                                           | 199    | 0.3  | 0.66 (0.45-0.97) | <b>0.04</b>      |                                   |        |      |                  |                  |
| Asian/Asian British                             | 1,082  | 1.5  | 0.33 (0.29-0.38) | <b>&lt;0.001</b> | <b>Patient status</b>             |        |      |                  |                  |
| Black/Black British                             | 885    | 1.2  | 0.41 (0.35-0.49) | <b>&lt;0.001</b> | Day case                          | 45,720 | 63.7 | 1 (ref)          |                  |
| Chinese                                         | 138    | 0.2  | 0.27 (0.19-0.39) | <b>&lt;0.001</b> | Inpatient                         | 26,073 | 36.3 | 0.84 (0.80-0.88) | <b>&lt;0.001</b> |
| Other                                           | 510    | 0.7  | 0.58 (0.46-0.73) | <b>&lt;0.001</b> |                                   |        |      |                  |                  |
|                                                 |        |      |                  |                  | <b>Time since first treatment</b> |        |      |                  |                  |
| <b>Long-standing conditions</b> <sup>a, b</sup> |        |      |                  |                  | < 1 year                          | 44,997 | 62.3 | 1 (ref)          |                  |
| None                                            | 48,218 | 67.2 |                  |                  | 1-5 years                         | 17,486 | 24.4 | 0.83 (0.78-0.87) | <b>&lt;0.001</b> |
| Deafness/hearing impairment                     | 7,281  | 10.1 | 0.91 (0.85-0.98) | <b>0.01</b>      | >5 years                          | 6,212  | 8.7  | 0.88 (0.81-0.95) | <b>0.002</b>     |
| Blindness/partially sighted                     | 1,856  | 2.6  | 0.74 (0.65-0.84) | <b>&lt;0.001</b> |                                   |        |      |                  |                  |
| Physical condition                              | 9,347  | 13.0 | 0.71 (0.67-0.76) | <b>&lt;0.001</b> |                                   |        |      |                  |                  |
| Learning disability                             | 354    | 0.5  | 0.50 (0.39-0.65) | <b>&lt;0.001</b> |                                   |        |      |                  |                  |
| Mental health condition                         | 1,347  | 1.9  | 0.55 (0.48-0.64) | <b>&lt;0.001</b> |                                   |        |      |                  |                  |
| Long-standing illness <sup>c</sup>              | 9,241  | 12.9 | 0.77 (0.73-0.82) | <b>&lt;0.001</b> |                                   |        |      |                  |                  |

Total number of respondents=71,793. Ethnicity was unknown for 7.4% respondents, long-standing conditions status for 7.3% and time since first treatment for 4.3%. Significant associations at  $\alpha=0.05$  level highlighted in bold.

<sup>a</sup> 6.7% of patients (n=4,780) had >1 long-standing condition, therefore the column total exceeds 100%

<sup>b</sup> Reference category for specific long-standing conditions is not having that condition

<sup>c</sup> Such as (but not limited to) HIV, diabetes, chronic heart disease or epilepsy

Table 2: Characteristics of trusts attended by survey respondents and their unadjusted associations with a positive overall rating of care from univariate logistic regression

| Trust-level characteristics                      |                                                               |             |                  |                  |
|--------------------------------------------------|---------------------------------------------------------------|-------------|------------------|------------------|
| Trust type                                       | n                                                             | %           | OR (95% CI)      | p-value          |
| Small acute                                      | 6,240                                                         | 8.7         | 1.23 (1.12-1.34) | <b>&lt;0.001</b> |
| Medium acute                                     | 16,677                                                        | 23.2        | 1.07 (1.01-1.14) | <b>0.02</b>      |
| Large acute                                      | 25,850                                                        | 36.0        | 1 (ref)          |                  |
| Specialist                                       | 3,224                                                         | 4.5         | 1.54 (1.36-1.76) | <b>&lt;0.001</b> |
| Teaching                                         | 19,802                                                        | 27.6        | 1.03 (0.98-1.10) | 0.24             |
| Foundation status                                | n                                                             | %           | OR (95% CI)      | p-value          |
| No                                               | 31,798                                                        | 44.3        | 0.82 (0.78-0.85) | <b>&lt;0.001</b> |
| Yes                                              | 39,995                                                        | 55.7        | 1 (ref)          |                  |
| CQC trust quality rating (2008/9)                | n                                                             | %           | OR (95% CI)      | p-value          |
| Weak                                             | 3,926                                                         | 5.6         | 0.85 (0.77-0.94) | <b>0.001</b>     |
| Fair                                             | 18,482                                                        | 26.2        | 0.97 (0.92-1.03) | 0.34             |
| Good                                             | 28,425                                                        | 40.3        | 1 ref            |                  |
| Excellent                                        | 19,748                                                        | 28.0        | 1.17 (1.10-1.24) | <b>&lt;0.001</b> |
| Frontline staff satisfied with care <sup>a</sup> | Quintiles of frontline staff satisfied with care <sup>b</sup> |             |                  |                  |
| Mean                                             | 63.5%                                                         |             | OR (95% CI)      | p-value          |
| Median                                           | 62.7%                                                         | 1 (lowest)  | 1 (ref)          |                  |
| Range                                            | 35.3 - 94.0%                                                  | 2           | 1.10 (1.03-1.19) | <b>0.01</b>      |
|                                                  |                                                               | 3           | 1.11 (1.03-1.19) | <b>0.004</b>     |
|                                                  |                                                               | 4           | 1.17 (1.09-1.26) | <b>&lt;0.001</b> |
|                                                  |                                                               | 5 (highest) | 1.35 (1.25-1.45) | <b>&lt;0.001</b> |

Total number of respondents=71,793. CQC trust quality rating was unknown for 3 trusts (1.7% of respondents) and the proportion of frontline staff satisfied with care was unknown for 1 trust (1.7% of respondents). Significant associations at  $\alpha=0.05$  level highlighted in bold.

<sup>a</sup> Calculated from responses to Q12d from the National NHS Staff Survey 2012

<sup>b</sup> Trusts were categorised into quintiles according to the proportion of staff responding positively to Q12d

Abbreviations: CQC=Care Quality Commission

### Variation in rating of care by patient, clinical and trust-level factors

Unadjusted associations between patient, clinical and trust-level characteristics and Q70 from univariate logistic regression analysis are shown in Tables 1 & 2. Among all respondents, statistically significant variation in overall rating of care by patient-level characteristics such as ethnicity, gender, age and long-standing conditions was observed. For example, women were less likely than men, and non-white patients were less likely than white patients, to rate their overall care very good or excellent. Chinese patients reported least favourably among non-white ethnic minorities.

1  
2 Younger and older patients were less likely than 66-75 year olds to rate their care very  
3 good or excellent, with the youngest patients (16-24 year olds) least likely to report  
4 excellent or very good overall care. Patients with any long-standing condition were less  
5 positive about their overall care; those with a learning disability or mental health  
6 condition were the least satisfied.  
7  
8  
9  
10  
11  
12

13  
14  
15  
16  
17 Clinical and trust-level characteristics were also associated with overall rating of care.  
18 With the exception of breast and skin cancer patients, all other patients were less likely  
19 than those with haematological cancers to rate their care as very good or excellent.  
20  
21 Inpatients, patients who began their treatment more than one year ago and those who  
22 attended large acute trusts, trusts without foundation status or trusts with a “weak”  
23 CQC rating were also less likely to rate their care as very good or excellent.  
24  
25  
26  
27  
28  
29  
30  
31  
32  
33

### 34 **Variation in patients’ rating of care adjusting for clinical and trust-level factors**

35  
36  
37 After excluding those with missing demographic, clinical or trust-level data, or those  
38 who did not provide a rating of their overall care, 60,528 respondents from 150 trusts  
39 remained for complete-case analysis. The distribution of patient, clinical and trust-level  
40 characteristics in the “complete-case” and “all respondents” populations was similar  
41 (Supplementary Table 1) and there was little difference in the univariate associations  
42 between the demographic characteristics and overall rating of care (with the exception  
43 of being deaf/having a hearing impairment which was not associated with a poorer  
44 rating of overall care during complete-case analysis, Table 3). Model 1 in Table 3  
45 shows the effect of mutually adjusting for all patient-level factors. The observed  
46 variation in rating under univariate logistic regression was mostly unaffected; negative  
47  
48  
49  
50  
51  
52  
53  
54  
55  
56  
57  
58  
59  
60

1  
2 associations between rating overall care positively and being female, younger, non-  
3 white or having a long-standing condition persisted. The magnitude of the associations  
4 was generally stable though there was a slight increase in the effect of having a mental  
5 health condition or learning disability and being of mixed ethnicity was no longer  
6 significantly associated. The addition of clinical factors (tumour group, time since first  
7 treatment and in- or day-patient status) to the regression model (Model 2) had little  
8 impact on variation by age or ethnicity, but the negative association between being  
9 female and care rating increased in magnitude. Including trust-level characteristics in  
10 the full multivariate model (Model 3) had a minimal effect on the associations between  
11 patients' socio-demographic characteristics and rating of care. Even when adjusting for  
12 clinical, trust and other patient-level factors clear variation in patients' rating of care by  
13 socio-demographic characteristics such as gender, age, ethnicity and long-standing  
14 conditions was evident. Female, younger, non-White patients or patients with a long-  
15 standing condition remained less likely to rate their overall care as excellent or very  
16 good.  
17  
18  
19  
20  
21  
22  
23  
24  
25  
26  
27  
28  
29  
30  
31  
32  
33  
34  
35  
36  
37  
38  
39  
40  
41  
42  
43  
44  
45  
46  
47  
48  
49  
50  
51  
52  
53  
54  
55  
56  
57  
58  
59  
60



Table 3: Association between positive rating of overall care and demographic characteristics adjusting for patient, clinical and trust-level factors

|                                             | Univariate <sup>a</sup> |                  | Model 1 <sup>b</sup>       |                  | Multivariate Model 2 <sup>c</sup> |                  | Model 3 <sup>d</sup>       |                  |
|---------------------------------------------|-------------------------|------------------|----------------------------|------------------|-----------------------------------|------------------|----------------------------|------------------|
|                                             | OR (95% CI)             | p-value          | OR <sub>adj</sub> (95% CI) | p-value          | OR <sub>adj</sub> (95% CI)        | p-value          | OR <sub>adj</sub> (95% CI) | p-value          |
| <b>Gender</b>                               |                         |                  |                            |                  |                                   |                  |                            |                  |
| Male                                        | 1 (ref)                 |                  | 1 (ref)                    |                  | 1 (ref)                           |                  | 1 (ref)                    |                  |
| Female                                      | 0.91 (0.87-0.96)        | <b>&lt;0.001</b> | 0.93 (0.88-0.98)           | <b>0.02</b>      | 0.72 (0.68-0.76)                  | <b>&lt;0.001</b> | 0.72 (0.68-0.77)           | <b>&lt;0.001</b> |
| <b>Age group</b>                            |                         |                  |                            |                  |                                   |                  |                            |                  |
| 16 - 25                                     | 0.65 (0.48-0.90)        | <b>0.01</b>      | 0.68 (0.48-0.98)           | <b>0.04</b>      | 0.61 (0.43-0.88)                  | <b>0.01</b>      | 0.58 (0.41-0.82)           | <b>0.002</b>     |
| 26 - 35                                     | 0.67 (0.55-0.81)        | <b>&lt;0.001</b> | 0.71 (0.60-0.86)           | <b>0.001</b>     | 0.64 (0.53-0.77)                  | <b>&lt;0.001</b> | 0.62 (0.51-0.75)           | <b>&lt;0.001</b> |
| 36 - 50                                     | 0.68 (0.63-0.75)        | <b>&lt;0.001</b> | 0.71 (0.65-0.78)           | <b>&lt;0.001</b> | 0.61 (0.56-0.67)                  | <b>&lt;0.001</b> | 0.60 (0.54-0.65)           | <b>&lt;0.001</b> |
| 51 - 65                                     | 0.76 (0.72-0.81)        | <b>&lt;0.001</b> | 0.77 (0.73-0.82)           | <b>&lt;0.001</b> | 0.73 (0.68-0.77)                  | <b>&lt;0.001</b> | 0.72 (0.68-0.77)           | <b>&lt;0.001</b> |
| 66 - 75                                     | 1 (ref)                 |                  | 1 (ref)                    |                  | 1 (ref)                           |                  | 1 (ref)                    |                  |
| 76+                                         | 0.85 (0.79-0.91)        | <b>&lt;0.001</b> | 0.86 (0.80-0.93)           | <b>&lt;0.001</b> | 0.90 (0.83-0.97)                  | <b>0.01</b>      | 0.90 (0.84-0.98)           | <b>0.01</b>      |
| <b>Ethnicity</b>                            |                         |                  |                            |                  |                                   |                  |                            |                  |
| White                                       | 1 (ref)                 |                  | 1 (ref)                    |                  | 1 (ref)                           |                  | 1 (ref)                    |                  |
| Mixed                                       | 0.65 (0.44-0.97)        | <b>0.04</b>      | 0.70 (0.45-1.10)           | 0.12             | 0.68 (0.44-1.08)                  | 0.10             | 0.67 (0.43-1.04)           | 0.08             |
| Asian                                       | 0.35 (0.30-0.40)        | <b>&lt;0.001</b> | 0.37 (0.31-0.44)           | <b>&lt;0.001</b> | 0.35 (0.30-0.42)                  | <b>&lt;0.001</b> | 0.35 (0.30-0.41)           | <b>&lt;0.001</b> |
| Black                                       | 0.45 (0.37-0.53)        | <b>&lt;0.001</b> | 0.46 (0.38-0.56)           | <b>&lt;0.001</b> | 0.46 (0.37-0.56)                  | <b>&lt;0.001</b> | 0.43 (0.36-0.53)           | <b>&lt;0.001</b> |
| Chinese                                     | 0.26 (0.18-0.38)        | <b>&lt;0.001</b> | 0.28 (0.19-0.41)           | <b>&lt;0.001</b> | 0.29 (0.20-0.42)                  | <b>&lt;0.001</b> | 0.27 (0.18-0.41)           | <b>&lt;0.001</b> |
| Other                                       | 0.61 (0.47-0.77)        | <b>&lt;0.001</b> | 0.62 (0.48-0.79)           | <b>&lt;0.001</b> | 0.61 (0.47-0.79)                  | <b>&lt;0.001</b> | 0.61 (0.47-0.77)           | <b>&lt;0.001</b> |
| <b>Long-standing conditions<sup>e</sup></b> |                         |                  |                            |                  |                                   |                  |                            |                  |
| Deafness/hearing impairment                 | 0.95 (0.87-1.02)        | 0.16             | 0.93 (0.85-0.99)           | 0.09             | 0.93 (0.85-1.01)                  | 0.09             | 0.93 (0.85-1.01)           | 0.09             |
| Blindness/visual impairment                 | 0.78 (0.68-0.90)        | <b>0.001</b>     | 0.85 (0.74-0.97)           | <b>0.01</b>      | 0.85 (0.75-0.98)                  | <b>&lt;0.001</b> | 0.86 (0.75-0.99)           | <b>0.03</b>      |
| Physical condition                          | 0.73 (0.68-0.78)        | <b>&lt;0.001</b> | 0.73 (0.69-0.77)           | <b>&lt;0.001</b> | 0.73 (0.69-0.77)                  | <b>&lt;0.001</b> | 0.74 (0.70-0.78)           | <b>&lt;0.001</b> |
| Learning disability                         | 0.49 (0.38-0.65)        | <b>&lt;0.001</b> | 0.66 (0.49-0.88)           | <b>0.01</b>      | 0.68 (0.51-0.90)                  | <b>0.01</b>      | 0.67 (0.50-0.90)           | <b>0.01</b>      |
| Mental health condition                     | 0.58 (0.50-0.67)        | <b>&lt;0.001</b> | 0.65 (0.57-0.74)           | <b>&lt;0.001</b> | 0.65 (0.57-0.74)                  | <b>&lt;0.001</b> | 0.65 (0.57-0.74)           | <b>&lt;0.001</b> |
| Long-standing illness                       | 0.79 (0.74-0.85)        | <b>&lt;0.001</b> | 0.79 (0.74-0.85)           | <b>&lt;0.001</b> | 0.80 (0.75-0.86)                  | <b>&lt;0.001</b> | 0.81 (0.75-0.87)           | <b>&lt;0.001</b> |

Significant associations at  $\alpha=0.05$  level with clustered robust standard errors highlighted in bold.

<sup>a</sup> Figures may differ from those presented in Tables 1 & 2 as they are based on 60,528 respondents from 150 trusts with complete data (i.e. complete-case analysis)

<sup>b</sup> Adjusted for patient factors (i.e. ethnicity, gender, age group, specific long-standing conditions)

<sup>c</sup> Adjusted for patient factors and clinical factors (i.e. patient status, tumour group and time since first treatment)

<sup>d</sup> Adjusted for patient factors, clinical factors and trust-level factors (i.e. trust type, foundation status, CQC trust quality rating and quintile of frontline staff satisfied with care)

<sup>e</sup> Reference category for specific long-standing conditions is not having that condition Abbreviations: OR=odds ratio; CI=confidence interval, ref=reference category

## DISCUSSION

Our analysis of the 2011-2012 NCPES demonstrates that there is marked variation in the experiences of cancer patients by socio-demographic factors. Women, younger patients, ethnic minorities and patients with a long-standing condition or disability were less likely to rate their cancer care as “*excellent*” or “*very good*”. This variation remained after adjusting for clinical factors, such as tumour group and duration of treatment, and trust-level factors. This suggests that the variation by socio-demographic factors is not a result of confounding but is attributable to real differences in experiences among these groups.

To the authors’ knowledge, this was the first study to explore cancer patients’ overall rating of care by socio-demographic characteristics including longstanding-conditions or disabilities. A principal strength of this study is the large sample size (> 71,000) and the response rate of 68%, which was significantly higher than that achieved by comparable surveys (22,23). Also, as all cancer patients treated by the NHS in England during the assigned 3 month study period were sent the survey, it is likely that findings can be generalised to the wider population of cancer patients. The main limitations of this study relate to the type of data available. The data for the trust quality score was collected approximately three years prior to the NCPES survey period and so may not reflect the quality of the trust at the time of patient admission. The influence of other potentially important predictors of patient experience such as employment status (20), level of deprivation (5) and health status (2,8,24) could not be explored as these data are not gathered through the NCPES. Furthermore, the binary categorisation of patients’ responses, as per DH Survey Guidance, condenses the patients’ experiences (which were already limited to several multiple choice options) and may mask potentially significant variation.

1  
2  
3  
4 Interpretation of the findings from NCPES data requires consideration of the possible  
5 determinants of variation in patients' responses to a survey question. Firstly, it is  
6 possible that variation reflects differing health, emotional or other support needs that  
7 are not met by cancer care services (12,14,25). Secondly, differential expectations  
8 between patient groups, perhaps pertaining to socio-cultural norms, may contribute to  
9 the observed patterns (8,26). Thirdly, certain patient groups may have a tendency to  
10 respond less positively, based on shared norms regarding feedback and ideas as to its  
11 purpose (26). Finally, variation may reflect real differences in the quality of care  
12 provided (8,26).  
13  
14  
15  
16  
17  
18  
19  
20  
21  
22  
23  
24  
25

26 Studies of patient experience in the general patient population have demonstrated  
27 systematic differences in experience by gender, age and ethnicity and the results of  
28 our study further add to this knowledge by demonstrating that similar variation exists  
29 among cancer patients. Adjusting for other socio-demographic factors, women were  
30 less likely to report positive experiences than men. This may be due to the increased  
31 emotional and support needs among female cancer patients described elsewhere  
32 (13,14). Breast cancer was the most common tumour group for females (38.4%,  
33 n=14,591) and in comparison to other tumour groups breast cancer patients were  
34 more likely to rate their care positively. Notably, when clinical factors such as tumour  
35 group were adjusted for, the magnitude of the negative association between gender  
36 and overall care rating increased. This may indicate that while patient experience  
37 varies modestly overall by gender there are marked differences between men and  
38 women with less common cancers. This is an area which merits further exploration.  
39  
40  
41  
42  
43  
44  
45  
46  
47  
48  
49  
50  
51  
52  
53  
54  
55  
56  
57  
58  
59  
60

1  
2 Younger patients were less likely to report positive experiences than older patients,  
3  
4 which corroborates previous findings in relation to age and patient satisfaction (4–8,13,  
5  
6 27). It has been suggested that this observation may reflect a generational  
7  
8 phenomenon, whereby older patients' responses are influenced by comparisons with  
9  
10 their parents' generation who may not have had access to advanced technologies of  
11  
12 modern treatment or the free care provided by the NHS, referred to as 'gratitude bias'  
13  
14 (28,29). Alternatively, younger patients may have higher expectations of quality of care  
15  
16 due to a reduced frequency of hospital visits compared to older patients (17). The  
17  
18 poorer rating of care in the oldest age group (76+ years) fits with neither theory and  
19  
20 further work to understand the cause of the variation in cancer patient experience by  
21  
22 age is required.  
23  
24  
25  
26  
27

28  
29 Ethnic minorities, especially Asian and specifically Chinese patients, reported less  
30  
31 positive experiences than white patients. This trend is similar to findings from previous  
32  
33 studies exploring variation in patient experiences of care generally (2,4,5) and  
34  
35 specifically for cancer (17,22). The extent to which these results are due to cultural  
36  
37 differences in expectations of care or willingness to criticise is unclear and  
38  
39 necessitates further research. Of significant concern is the possibility that these  
40  
41 patients experience poorer quality of care owing to a lack of understanding of the care  
42  
43 needs of these minority groups or to discrimination, unintended or otherwise (8).  
44  
45  
46  
47  
48

49 Patients with various long-standing conditions reported significantly less positive  
50  
51 patient experiences than those without. The worst experiences were reported by  
52  
53 patients with a learning disability or mental health condition. Given the small numbers  
54  
55 of patients in these groups and the strength of the association it seems likely that there  
56  
57 is marked variation in their experiences compared to other patients. Patients with long-  
58  
59  
60

1  
2 standing illnesses such as diabetes and chronic heart disease were also less likely to  
3  
4 rate their care as “excellent” or “very good.” Given that the number of patients with  
5  
6 such illnesses is set to rise in the future with an ageing patient population it is  
7  
8 important to explore how having co-morbidities influences patients’ experience of  
9  
10 cancer care.  
11

12  
13  
14  
15 This study presents evidence of inequalities in experiences of cancer care by gender,  
16  
17 age, ethnicity and disability. Whilst it is possible that some of the variation observed  
18  
19 between patient groups is a result of varying socio-cultural expectations or tendencies  
20  
21 to rate care positively, it is also possible that the quality of care truly differs between  
22  
23 patient groups. Further investigation of the experiences of women, ethnic minorities,  
24  
25 younger patients and those with a disability is needed so that cancer care services can  
26  
27 be better tailored to meet the needs and expectations of these groups. Analysis of the  
28  
29 NCPES qualitative free text questions and other patient experience data at a trust level  
30  
31 would help to inform quality improvement initiatives. The findings of this study would  
32  
33 appear to suggest that, if used as a comparative performance indicator (as is NCPES  
34  
35 data) patient experience measures should be adjusted for age, gender and ethnicity.  
36  
37 An unadjusted measure of performance could unfairly disadvantage hospital trusts  
38  
39 with higher than average proportion of ethnic minority patients, for example. However,  
40  
41 the impact of adjusting NCPES data for demographic characteristics on trust rankings  
42  
43 has been shown to be minimal (30). Adjusting for gender, age and ethnicity causes  
44  
45 few trusts to move into or out of the top or bottom 20% of trusts nationally. While they  
46  
47 may not account for much of the between-trust variation in cancer patient experience  
48  
49 the overall variation in patient experience by demographic factors is important in its  
50  
51 own right and warrants further attention.  
52  
53  
54  
55  
56  
57  
58  
59  
60

1  
2 Responses to survey questions are a result of patients' perception and interpretation of  
3  
4 events, which are shaped by expectations and clinical or emotional needs, in addition  
5  
6 to the quality of services received. Meeting the care needs of all patients equally is a  
7  
8 fundamental principle of the NHS and high-quality cancer services must strive to meet  
9  
10 the needs of its diverse patient population. This study identifies patient groups for  
11  
12 which cancer care services are in greatest need of improvement.  
13  
14  
15  
16  
17  
18  
19  
20  
21  
22

### 23 **KEY MESSAGES (3-4 sentences less than 25 words each)**

- 24  
25 • Adjusting for clinical and trust-level factors, there is evidence of inequalities in  
26  
27 patients' experiences of cancer care by socio-demographic characteristics.  
28
- 29  
30 • Female, younger and non-white (especially Asian) cancer patients are less  
31  
32 likely to rate their overall care as excellent or very good.  
33
- 34  
35 • Patients with a long-standing condition also report poorer overall care, patients  
36  
37 with a learning disability or mental health condition being least satisfied.  
38
- 39  
40 • While patient experience varies modestly overall by gender, there may be  
41  
42 marked differences between the experiences of men and women with less  
43  
44 common cancers.  
45  
46  
47  
48  
49  
50  
51  
52  
53  
54  
55  
56  
57  
58  
59  
60

**LICENCE FOR PUBLICATION STATEMENT**

The Corresponding Author has the right to grant on behalf of all authors and does grant on behalf of all authors, an exclusive licence (or non-exclusive for government employees) on a worldwide basis to the BMJ Group and co-owners or contracting owning societies (where published by the BMJ Group on their behalf), and its Licensees to permit this article (if accepted) to be published in Sexually Transmitted Infections and any other BMJ Group products and to exploit all subsidiary rights, as set out in our licence <http://group.bmj.com/products/journals/instructions-for-authors/licence-forms>.

**Acknowledgements:** None

**Contributorship statement:** HW devised the study, advised on data analysis and participated in interpreting the data and reviewing the manuscript; SD participated in interpreting the data and reviewing the manuscript; LM carried out supplementary data analysis, participated in interpreting the data and co-prepared the manuscript; AB carried out the statistical analysis, interpreted the data and co-prepared the manuscript.

**Funding:** There was no specific funding for this project. HW, SD and LM are supported by the NIHR Imperial College Healthcare NHS Trust Biomedical Research Centre and Imperial College Healthcare Charity.

**Competing interests:** None

**Ethics:** No ethical approval was required for this study

**Data sharing:** The National Cancer Patient Experience Survey 2012-13 dataset used is available for download from <http://ukdataservice.ac.uk>.

## REFERENCES

1. NHS England. Putting patients first: The NHS England business plan for 2013/14 – 2015/16. 2012 p. 1–64.
2. Healthcare Commission. Variations in the experiences of patients in England: Analysis of the Healthcare Commission's 2003/2004 national surveys of patients. London; 2005 p. 1–35.
3. Department of Health. Report on the self reported experience of patients from black and minority ethnic groups. London; 2009 p. 1–31.
4. Campbell JL, Ramsay J, Green J. Age, gender, socioeconomic, and ethnic differences in patients' assessments of primary health care. *Qual Health Care* 2001;**10**(2):90–5.
5. Commission for Health Improvement. Unpacking the patients' perspective: Variations in NHS patient experience in England. London; 2004 p. 1–112.
6. Sizmur S. Multilevel analysis of inpatient experience. Picker Institute Europe. 2011 p. 1–28.
7. Jenkinson C, Coulter A, Bruster S, et al. Patients' experiences and satisfaction with health care: results of a questionnaire study of specific aspects of care. *Qual Saf Health Care* 2002;**11**(4):335–9.
8. Lyratzopoulos G, Elliott M, Barbieri JM, et al. Understanding ethnic and other socio-demographic differences in patient experience of primary care: evidence



- 1  
2 from the English General Practice Patient Survey. *BMJ Qual Saf*  
3  
4 2012;**21**(1):21–9.  
5  
6  
7  
8 9. Mead N, Roland M. Understanding why some ethnic minority patients evaluate  
9 medical care more negatively than white patients: a cross sectional analysis of a  
10 routine patient survey in English general practices. *BMJ* 2009;**339**:b3450.  
11  
12  
13  
14  
15 10. Department of Health. Improving Outcomes: A Strategy for Cancer. 2011 p. 1–  
16 99.  
17  
18  
19  
20  
21 11. Davidson R, Mills ME. Cancer patients' satisfaction with communication,  
22 information and quality of care in a UK region. *Eur J Cancer Care (Engl)*  
23 2005;**14**(1):83–90.  
24  
25  
26  
27  
28  
29 12. Cox A, Jenkins V, Catt S, et al. Information needs and experiences: an audit of  
30 UK cancer patients. *Eur J Oncol Nurs* 2006;**10**(4):263–72.  
31  
32  
33  
34  
35 13. Clarke S, Booth L, Velikova G, et al. Social support: gender differences in cancer  
36 patients in the United Kingdom. *Cancer Nurs* 2006;**29**(1):66–72.  
37  
38  
39  
40 14. Morrison V, Henderson BJ, Zinovieff F, et al. Common, important, and unmet  
41 needs of cancer outpatients. *Eur J Oncol Nurs* 2012;**16**:115–23.  
42  
43  
44  
45  
46 15. Department of Health. Cancer Patient Experience Survey 2011/12: National  
47 Report. 2011 p. 1–168.  
48  
49  
50  
51 16. Saunders CL, Abel GA, El Turabi A, et al. Accuracy of routinely recorded ethnic  
52 group information compared with self-reported ethnicity: evidence from the  
53 English Cancer Patient Experience Survey. *BMJ Open*. 2013;**3**(6):1–9.  
54  
55  
56  
57  
58  
59  
60

17. El Turabi A, Abel GA, Roland M, et al. Variation in reported experience of involvement in cancer treatment decision making: evidence from the National Cancer Patient Experience Survey. *Br J Cancer* 2013;**109**(3):780–7.
18. Ipsos MORI. Frontiers of performance in the NHS II. 2008 p. 1–100.
19. Raleigh VS, Frosini F, Sizmur S, et al. Do some trusts deliver a consistently better experience for patients? An analysis of patient experience across acute care surveys in English NHS trusts. *BMJ Qual Saf* 2012;**21**(5):381–90.
20. Kontopantelis E, Roland M, Reeves D. Patient experience of access to primary care: identification of predictors in a national patient survey. *BMC Fam Pract* 2010;**11**(61):1–15.
21. Kreft IG, de Leeuw J. *Introducing Multilevel Modeling*. London: SAGE Publications; 2002.
22. Lyratzopoulos G, Neal RD, Barbiere JM, et al. Variation in number of general practitioner consultations before hospital referral for cancer: findings from the 2010 National Cancer Patient Experience Survey in England. *Lancet Oncol* 2012;**13**(4):353–65.
23. Care Quality Commission. National NHS patient survey programme: Survey of adult inpatients 2012. 2013 p. 1–34.
24. Cohen G. Age and health status in a patient satisfaction survey. *Soc Sci Med* 1996;**42**(7):1085–93.
25. Pinquart M, Duberstein PR. Information needs and decision-making processes in older cancer patients. *Crit Rev Oncol Hematol* 2004;**51**(1):69–80.

- 1  
2  
3  
4  
5  
6  
7  
8  
9  
10  
11  
12  
13  
14  
15  
16  
17  
18  
19  
20  
21  
22  
23  
24  
25  
26  
27  
28  
29  
30  
31  
32  
33  
34  
35  
36  
37  
38  
39  
40  
41  
42  
43  
44  
45  
46  
47  
48  
49  
50  
51  
52  
53  
54  
55  
56  
57  
58  
59  
60
26. Perneger T. Adjustment for patient characteristics in satisfaction surveys. *Int J Qual Heal Care* 2004;**16**(6):433–5.
27. Crow R, Gage H, Hampson S, et al. The measurement of satisfaction practice from a systematic review. *Health Technol Assess* 2002;**6**(32):1–250.
28. Department of Health. Methods, reasoning and scope: Statement of methodology for the overall patient experience scores. 2013 p. 1–28.
29. Bowling A. An “inverse satisfaction law”? Why don’t older patients criticise health services? *J Epidemiol Community Health* 2002;**56**(7):482.
30. Saunders K, Lyratzopoulos G, Abel G. Is case-mix adjustment important for the National Cancer Patient Experience Survey in England? Cambridge Centre for Health Services Research; 2013 p. 1–12.

1  
2  
3  
4  
5  
6  
7  
8  
9  
10  
11  
12  
13  
14  
15  
16  
17  
18  
19  
20  
21  
22  
23  
24  
25  
26  
27  
28  
29  
30  
31  
32  
33  
34  
35  
36  
37  
38  
39  
40  
41  
42  
43  
44  
45  
46  
47  
48  
49  
50  
51  
52  
53  
54  
55  
56  
57  
58  
59  
60

# Inequalities in cancer patients' experiences of care: analysis of data from the National Cancer Patient Experience Survey 2011-12

**Corresponding author:** Louise Mc Grath-Lone, Patient Experience Research Centre, School of Public Health, Imperial College London, W2 1PG, UK.

E-mail: Louise.mc-grath-lone@imperial.ac.uk

Phone: 0207 5943417

Fax: 0207 4023927

**Authors:** Anna Bone<sup>1</sup>, Louise Mc Grath-Lone<sup>2</sup>, Sophie Day<sup>2</sup>, Helen Ward.<sup>2</sup>

**Affiliations:**

1. School of Public Health, Imperial College London, W2 1PG, UK.
2. Patient Experience Research Centre, School of Public Health, Imperial College, London, W2 1PG, UK.

**Keywords:** Patient satisfaction, quality measurement, surveys

**Word count:** 2,912

## ABSTRACT

### Background

Patient experience is a key component of quality in healthcare; however, studies in the UK indicate that patients' experience of care is not equal across gender, age and ethnicity. There are currently 1.8 million people living with cancer in the UK but less is known about their experiences of care. Whether inequalities by socio-demographic characteristics exist amongst cancer patients is not well-documented.

### Methods

Using cross-sectional data from 71,793 cancer patients who completed the National Cancer Patient Experience Survey 2011-2012, we examined associations between patient, clinical and trust-level factors and a summary measure of patient experience, namely overall rating of care. Multivariate logistic regression was used to investigate variation by socio-demographic characteristics adjusting for other patient, clinical and trust-level factors.

### Results

Female, non-white and younger patients were less likely to rate their overall care as excellent or very good. Patients with long-standing conditions, particularly those with learning disabilities or mental health conditions also reported poorer overall care. This variation persisted when other patient, clinical and trust-level factors were controlled

1  
2 for, indicating there are real differences in experiences among cancer patients by  
3  
4 socio-demographic characteristics.  
5  
6  
7  
8

## 9 10 **Conclusion**

11  
12 There is evidence of inequalities in cancer patient experience in the UK by socio-  
13 demographic characteristics such as gender, age, ethnicity and disability. Quality  
14 cancer care services must strive to meet the needs of a diverse patient population  
15 equally; this study identifies patient groups for whom it appears cancer care services  
16 are in greatest need of improvement.  
17  
18  
19  
20  
21  
22  
23  
24  
25  
26  
27

## 28 **Article summary: Strengths and limitations of this study**

- 29  
30  
31
- 32 • To the authors' knowledge, this is the first study to explore cancer patients'  
33 overall rating of care by socio-demographic characteristics including  
34 longstanding-conditions or disabilities.  
35  
36
  - 37 • A principal strength of this study is the large sample size (> 71,000) and high  
38 response rate (68%).  
39  
40
  - 41 • As this study involves secondary analysis of national survey data it is limited by  
42 the type of data available e.g. the influence of potentially important predictors of  
43 patient experience such as employment status, level of deprivation and health  
44 status could not be explored as these data were not gathered.  
45  
46  
47  
48
  - 49 • A further limitation is that the binary categorisation of patients' responses  
50 condenses the patients' experiences (which were already limited to several  
51 multiple choice options) and may mask potentially significant variation.  
52  
53  
54  
55  
56  
57  
58  
59  
60

## INTRODUCTION

Patient experience is a key component of quality in healthcare and is one of the top priorities in the NHS (1). However, studies in the UK indicate that there are systematic differences in patient experience by socio-demographic characteristics (2–4). For example, studies on primary and hospital care have found that patients tend to report more positive experiences with increasing age (4–8), females report less positive experiences than males (5,6) and non-white patients report less positive experiences than white patients, even after adjusting for other socio-demographic variables (3,5,6,9). Less is known about variation in the experiences of cancer patients. There are currently 1.8 million people living with cancer in the UK (10) and advances in cancer treatments mean that they are living longer and facing prolonged periods of contact with healthcare services because of complex treatment regimens (11). In 2011, a Department of Health (DH) report set out the government's strategy to improve outcomes by putting patients at the heart of cancer health services (10). A key objective of this strategy was to reduce inequalities in care relating to both clinical outcomes and patient experience. Thus, exploration of the experiences of cancer patients and the inequalities that may exist is critical in order to identify patient groups for whom cancer care services are in greatest need of improvement.

Detailed studies on the experiences of cancer patients have often relied on small sample sizes (12–14). However, a regular National Cancer Patient Experience Survey (NCPES) has been established which provides a wealth of information on care and treatment experiences. The 2011-12 survey includes responses from over 71,000 cancer patients from 160 trusts across the UK (15). With a relatively high response rate and large sample size, the survey presents an opportunity to explore inequalities

1  
2 in the quality of care received by cancer patients. Here, we aim to describe the  
3  
4 variation in cancer patient experience by age, gender, ethnicity and presence of long-  
5  
6 standing conditions or disabilities in order to explore whether there are systematic  
7  
8 inequalities. We further examine the influence of clinical and trust-level factors on  
9  
10 these variations.  
11  
12

## 13 14 15 16 17 **METHODS** 18

### 19 20 21 **Source of data** 22

23  
24 We carried out a secondary analysis of 2011-2012 NCPES cross-sectional data  
25  
26 collected by Quality Health (Chesterfield, UK) on behalf of the DH. All patients with a  
27  
28 primary diagnosis of cancer who attended an NHS hospital as an inpatient or day case  
29  
30 between 1<sup>st</sup> September 2011 and 30<sup>th</sup> November 2011 were sent the survey (15).  
31  
32 Non-responders were followed up with two postal reminders. The final response rate  
33  
34 achieved was 68%. As no survey weights were available, the data could not be  
35  
36 weighted to adjust for non-response. The dataset included demographic and clinical  
37  
38 characteristics for 71,793 cancer patients who attended 160 hospital trusts across  
39  
40 England, as well as their responses to 70 multiple choice questions relating to various  
41  
42 aspects of their experiences of care. Surveys such as NCPES are commonly used to  
43  
44 measure patient experience over a range of domains; however, single summary  
45  
46 measures of overall experience, such as the Family and Friends Test, have become  
47  
48 increasingly important (1). Our analysis focused on a summary measure of patient  
49  
50 experience, namely patients' assessment of care as measured by Q70 in the survey,  
51  
52 "*Overall, how would you rate your care?*" Responses from a five point scale were  
53  
54 transformed into a binary outcome, with "*excellent*" and "*very good*" categorised as  
55  
56  
57  
58  
59  
60



1  
2 'positive' and "good", "fair" and "poor" as 'not positive', in accordance with the DH  
3  
4 Survey Guidance (15).  
5  
6  
7  
8  
9

### 10 **Patient, clinical and trust-level characteristics**

11  
12  
13 The main socio-demographic characteristics of interest in this study (gender, age and  
14 ethnicity) were ascertained by self-report (16) and grouped as in the national report  
15 (15). As Chinese patients have reported less positive experiences than white patients  
16 elsewhere (3,6,17), the "Chinese" ethnic category was not combined with "Other" in  
17 this analysis. For age and ethnicity the largest groups were chosen as the reference  
18 category. Responses to the question "*Do you have any of the following long-standing*  
19 *conditions?*" were used to identify patients with co-morbidities. The clinical  
20 characteristics of tumour group and patient status (i.e. day or inpatient) were taken  
21 from hospital administration records.  
22  
23  
24  
25  
26  
27  
28  
29  
30  
31  
32  
33  
34  
35  
36

37 Haematological cancer patients were assigned as the reference tumour group as the  
38 largest group (breast) did not have a representative age and gender distribution. Time  
39 since first treatment was ascertained by patients' survey responses. As trust-level  
40 factors have previously been associated with patient experience (6,18–20) several  
41 were included in this analysis. Hospital trusts were categorised by type (large acute,  
42 medium acute, small acute, specialist and teaching) and by foundation status. The  
43 Care Quality Commission's (CQCs) 2008/2009 Annual Health Check rating and the  
44 proportion of frontline staff satisfied with care at their trust (Q12d from the National  
45 NHS Staff Survey 2012) were also included as measures of trusts' overall quality.  
46  
47  
48  
49  
50  
51  
52  
53  
54  
55  
56  
57  
58  
59  
60  
61  
62  
63  
64  
65  
66  
67  
68  
69  
70  
71  
72  
73  
74  
75  
76  
77  
78  
79  
80  
81  
82  
83  
84  
85  
86  
87  
88  
89  
90  
91  
92  
93  
94  
95  
96  
97  
98  
99  
100  
101  
102  
103  
104  
105  
106  
107  
108  
109  
110  
111  
112  
113  
114  
115  
116  
117  
118  
119  
120  
121  
122  
123  
124  
125  
126  
127  
128  
129  
130  
131  
132  
133  
134  
135  
136  
137  
138  
139  
140  
141  
142  
143  
144  
145  
146  
147  
148  
149  
150  
151  
152  
153  
154  
155  
156  
157  
158  
159  
160  
161  
162  
163  
164  
165  
166  
167  
168  
169  
170  
171  
172  
173  
174  
175  
176  
177  
178  
179  
180  
181  
182  
183  
184  
185  
186  
187  
188  
189  
190  
191  
192  
193  
194  
195  
196  
197  
198  
199  
200  
201  
202  
203  
204  
205  
206  
207  
208  
209  
210  
211  
212  
213  
214  
215  
216  
217  
218  
219  
220  
221  
222  
223  
224  
225  
226  
227  
228  
229  
230  
231  
232  
233  
234  
235  
236  
237  
238  
239  
240  
241  
242  
243  
244  
245  
246  
247  
248  
249  
250  
251  
252  
253  
254  
255  
256  
257  
258  
259  
260  
261  
262  
263  
264  
265  
266  
267  
268  
269  
270  
271  
272  
273  
274  
275  
276  
277  
278  
279  
280  
281  
282  
283  
284  
285  
286  
287  
288  
289  
290  
291  
292  
293  
294  
295  
296  
297  
298  
299  
300  
301  
302  
303  
304  
305  
306  
307  
308  
309  
310  
311  
312  
313  
314  
315  
316  
317  
318  
319  
320  
321  
322  
323  
324  
325  
326  
327  
328  
329  
330  
331  
332  
333  
334  
335  
336  
337  
338  
339  
340  
341  
342  
343  
344  
345  
346  
347  
348  
349  
350  
351  
352  
353  
354  
355  
356  
357  
358  
359  
360  
361  
362  
363  
364  
365  
366  
367  
368  
369  
370  
371  
372  
373  
374  
375  
376  
377  
378  
379  
380  
381  
382  
383  
384  
385  
386  
387  
388  
389  
390  
391  
392  
393  
394  
395  
396  
397  
398  
399  
400  
401  
402  
403  
404  
405  
406  
407  
408  
409  
410  
411  
412  
413  
414  
415  
416  
417  
418  
419  
420  
421  
422  
423  
424  
425  
426  
427  
428  
429  
430  
431  
432  
433  
434  
435  
436  
437  
438  
439  
440  
441  
442  
443  
444  
445  
446  
447  
448  
449  
450  
451  
452  
453  
454  
455  
456  
457  
458  
459  
460  
461  
462  
463  
464  
465  
466  
467  
468  
469  
470  
471  
472  
473  
474  
475  
476  
477  
478  
479  
480  
481  
482  
483  
484  
485  
486  
487  
488  
489  
490  
491  
492  
493  
494  
495  
496  
497  
498  
499  
500  
501  
502  
503  
504  
505  
506  
507  
508  
509  
510  
511  
512  
513  
514  
515  
516  
517  
518  
519  
520  
521  
522  
523  
524  
525  
526  
527  
528  
529  
530  
531  
532  
533  
534  
535  
536  
537  
538  
539  
540  
541  
542  
543  
544  
545  
546  
547  
548  
549  
550  
551  
552  
553  
554  
555  
556  
557  
558  
559  
560  
561  
562  
563  
564  
565  
566  
567  
568  
569  
570  
571  
572  
573  
574  
575  
576  
577  
578  
579  
580  
581  
582  
583  
584  
585  
586  
587  
588  
589  
590  
591  
592  
593  
594  
595  
596  
597  
598  
599  
600  
601  
602  
603  
604  
605  
606  
607  
608  
609  
610  
611  
612  
613  
614  
615  
616  
617  
618  
619  
620  
621  
622  
623  
624  
625  
626  
627  
628  
629  
630  
631  
632  
633  
634  
635  
636  
637  
638  
639  
640  
641  
642  
643  
644  
645  
646  
647  
648  
649  
650  
651  
652  
653  
654  
655  
656  
657  
658  
659  
660  
661  
662  
663  
664  
665  
666  
667  
668  
669  
670  
671  
672  
673  
674  
675  
676  
677  
678  
679  
680  
681  
682  
683  
684  
685  
686  
687  
688  
689  
690  
691  
692  
693  
694  
695  
696  
697  
698  
699  
700  
701  
702  
703  
704  
705  
706  
707  
708  
709  
710  
711  
712  
713  
714  
715  
716  
717  
718  
719  
720  
721  
722  
723  
724  
725  
726  
727  
728  
729  
730  
731  
732  
733  
734  
735  
736  
737  
738  
739  
740  
741  
742  
743  
744  
745  
746  
747  
748  
749  
750  
751  
752  
753  
754  
755  
756  
757  
758  
759  
760  
761  
762  
763  
764  
765  
766  
767  
768  
769  
770  
771  
772  
773  
774  
775  
776  
777  
778  
779  
780  
781  
782  
783  
784  
785  
786  
787  
788  
789  
790  
791  
792  
793  
794  
795  
796  
797  
798  
799  
800  
801  
802  
803  
804  
805  
806  
807  
808  
809  
810  
811  
812  
813  
814  
815  
816  
817  
818  
819  
820  
821  
822  
823  
824  
825  
826  
827  
828  
829  
830  
831  
832  
833  
834  
835  
836  
837  
838  
839  
840  
841  
842  
843  
844  
845  
846  
847  
848  
849  
850  
851  
852  
853  
854  
855  
856  
857  
858  
859  
860  
861  
862  
863  
864  
865  
866  
867  
868  
869  
870  
871  
872  
873  
874  
875  
876  
877  
878  
879  
880  
881  
882  
883  
884  
885  
886  
887  
888  
889  
890  
891  
892  
893  
894  
895  
896  
897  
898  
899  
900  
901  
902  
903  
904  
905  
906  
907  
908  
909  
910  
911  
912  
913  
914  
915  
916  
917  
918  
919  
920  
921  
922  
923  
924  
925  
926  
927  
928  
929  
930  
931  
932  
933  
934  
935  
936  
937  
938  
939  
940  
941  
942  
943  
944  
945  
946  
947  
948  
949  
950  
951  
952  
953  
954  
955  
956  
957  
958  
959  
960  
961  
962  
963  
964  
965  
966  
967  
968  
969  
970  
971  
972  
973  
974  
975  
976  
977  
978  
979  
980  
981  
982  
983  
984  
985  
986  
987  
988  
989  
990  
991  
992  
993  
994  
995  
996  
997  
998  
999  
1000

1  
2 analysis with the lowest quintile as reference category. The reference categories  
3  
4 chosen for other trust-level factors were the largest groups.  
5  
6  
7  
8  
9

## 10 **Data analysis**

11  
12 Variation in patients' overall rating of care by patient, clinical and trust-level factors was  
13 investigated using univariate logistic regression. Respondents with missing  
14 demographic, clinical or trust-level data, or those who did not answer Q70, were then  
15 excluded (i.e. complete-case analysis was undertaken) and multivariate logistic  
16 regression was used to describe associations between the individual demographic  
17 characteristics of interest and overall rating of care. Confounding by patient, clinical  
18 and trust-level factors was controlled for through their sequential addition to the model.  
19  
20 Logistic regression was chosen as the small intra-class coefficient calculated for Q70  
21 (<0.01) suggested the effect of clustering by trust among respondents was negligible;  
22 therefore, it was anticipated that a multilevel model and a multivariate logistic  
23 regression model would produce similar results (21). However, as even small intra-  
24 class correlations can inflate type-1 errors, clustered robust standard errors were  
25 utilised. All statistical analyses were conducted in Stata V.12.  
26  
27  
28  
29  
30  
31  
32  
33  
34  
35  
36  
37  
38  
39  
40  
41  
42  
43  
44  
45  
46  
47  
48  
49  
50  
51  
52  
53  
54  
55  
56  
57  
58  
59  
60

## RESULTS

### Patient characteristics and rating of care

A total of 71,793 patients admitted to hospital trusts across England with a primary cancer diagnosis completed the survey. Table 1 shows the demographic and clinical characteristics of respondents and Table 2 the characteristics of the hospital trusts they attended. The majority of patients were white, female and >50 years old and there were substantial numbers with disabilities or other long-standing conditions. The most common tumour groups were breast and haematological cancers. Most respondents had started their treatment in the last year and were admitted to hospital as day case patients on their most recent visit. Most were treated in large acute trusts, trusts with foundation status and trusts rated 'Good' by CQC. The majority of patients (96.5%, n=69,276) provided a response to Q70 "Overall, how would you rate your care?" In total 87.8% rated their care as "excellent" or "very good" while the remaining 12.2% rated their care "good", "fair" or "poor" (Fig.1 ).

Table 1: Characteristics of survey respondents and their unadjusted associations with a positive overall rating of care from univariate logistic regression

| Patient characteristics                         |        |      |                  |         | Clinical characteristics          |        |      |                  |         |
|-------------------------------------------------|--------|------|------------------|---------|-----------------------------------|--------|------|------------------|---------|
|                                                 | n      | %    | OR (95% CI)      | p-value |                                   | n      | %    | OR (95% CI)      | p-value |
| <b>Gender</b>                                   |        |      |                  |         | <b>Tumour group</b>               |        |      |                  |         |
| Male                                            | 33,832 | 47.1 | 1 (ref)          |         | Brain/CNS                         | 746    | 1.0  | 0.52 (0.42-0.63) | <0.001  |
| Female                                          | 37,961 | 52.9 | 0.92 (0.88-0.96) | <0.001  | Breast                            | 14,739 | 20.5 | 1.00 (0.92-1.09) | 0.98    |
|                                                 |        |      |                  |         | Colorectal / Lower GI             | 9,483  | 13.2 | 0.72 (0.66-0.78) | <0.001  |
| <b>Age group</b>                                |        |      |                  |         | Gynaecological                    | 4,202  | 5.9  | 0.72 (0.64-0.80) | <0.001  |
| 16 - 25                                         | 363    | 0.5  | 0.68 (0.51-0.92) | 0.01    | Haematological                    | 11,070 | 15.4 | 1 (ref)          |         |
| 26 - 35                                         | 969    | 1.4  | 0.62 (0.52-0.75) | <0.001  | Head and Neck                     | 2,422  | 3.4  | 0.71 (0.62-0.81) | <0.001  |
| 36 - 50                                         | 6,802  | 9.5  | 0.70 (0.64-0.76) | <0.001  | Lung                              | 5,029  | 7.0  | 0.77 (0.69-0.85) | <0.001  |
| 51 - 65                                         | 22,885 | 31.9 | 0.79 (0.74-0.83) | <0.001  | Other                             | 1,138  | 1.6  | 0.72 (0.59-0.86) | <0.001  |
| 66 - 75                                         | 23,643 | 32.9 | 1 (ref)          |         | Prostate                          | 5,831  | 8.1  | 0.70 (0.64-0.78) | <0.001  |
| 76+                                             | 17,131 | 23.9 | 0.85 (0.79-0.90) | <0.001  | Sarcoma                           | 2,451  | 3.4  | 0.61 (0.53-0.69) | <0.001  |
|                                                 |        |      |                  |         | Skin                              | 1,695  | 2.4  | 0.98 (0.82-1.16) | 0.80    |
| <b>Ethnicity</b>                                |        |      |                  |         | Upper GI                          | 4,540  | 6.3  | 0.61 (0.55-0.68) | <0.001  |
| White                                           | 63,652 | 88.7 | 1 (ref)          |         | Urological                        | 8,447  | 11.8 | 0.64 (0.58-0.70) | <0.001  |
| Mixed                                           | 199    | 0.3  | 0.66 (0.45-0.97) | 0.04    |                                   |        |      |                  |         |
| Asian/Asian British                             | 1,082  | 1.5  | 0.33 (0.29-0.38) | <0.001  | <b>Patient status</b>             |        |      |                  |         |
| Black/Black British                             | 885    | 1.2  | 0.41 (0.35-0.49) | <0.001  | Day case                          | 45,720 | 63.7 | 1 (ref)          |         |
| Chinese                                         | 138    | 0.2  | 0.27 (0.19-0.39) | <0.001  | Inpatient                         | 26,073 | 36.3 | 0.84 (0.80-0.88) | <0.001  |
| Other                                           | 510    | 0.7  | 0.58 (0.46-0.73) | <0.001  |                                   |        |      |                  |         |
|                                                 |        |      |                  |         | <b>Time since first treatment</b> |        |      |                  |         |
| <b>Long-standing conditions</b> <sup>a, b</sup> |        |      |                  |         | < 1 year                          | 44,997 | 62.3 | 1 (ref)          |         |
| None                                            | 48,218 | 67.2 |                  |         | 1-5 years                         | 17,486 | 24.4 | 0.83 (0.78-0.87) | <0.001  |
| Deafness/hearing impairment                     | 7,281  | 10.1 | 0.91 (0.85-0.98) | 0.01    | >5 years                          | 6,212  | 8.7  | 0.88 (0.81-0.95) | 0.002   |
| Blindness/partially sighted                     | 1,856  | 2.6  | 0.74 (0.65-0.84) | <0.001  |                                   |        |      |                  |         |
| Physical condition                              | 9,347  | 13.0 | 0.71 (0.67-0.76) | <0.001  |                                   |        |      |                  |         |
| Learning disability                             | 354    | 0.5  | 0.50 (0.39-0.65) | <0.001  |                                   |        |      |                  |         |
| Mental health condition                         | 1,347  | 1.9  | 0.55 (0.48-0.64) | <0.001  |                                   |        |      |                  |         |
| Long-standing illness <sup>c</sup>              | 9,241  | 12.9 | 0.77 (0.73-0.82) | <0.001  |                                   |        |      |                  |         |

Total number of respondents=71,793. Ethnicity was unknown for 7.4% respondents, long-standing conditions status for 7.3% and time since first treatment for 4.3%. Significant associations at  $\alpha=0.05$  level highlighted in bold.

<sup>a</sup> 6.7% of patients (n=4,780) had >1 long-standing condition, therefore the column total exceeds 100%

<sup>b</sup> Reference category for specific long-standing conditions is not having that condition

<sup>c</sup> Such as (but not limited to) HIV, diabetes, chronic heart disease or epilepsy

Table 2: Characteristics of trusts attended by survey respondents and their unadjusted associations with a positive overall rating of care from univariate logistic regression

| Trust-level characteristics                      |                                                               |             |                  |                  |
|--------------------------------------------------|---------------------------------------------------------------|-------------|------------------|------------------|
| Trust type                                       | n                                                             | %           | OR (95% CI)      | p-value          |
| Small acute                                      | 6,240                                                         | 8.7         | 1.23 (1.12-1.34) | <b>&lt;0.001</b> |
| Medium acute                                     | 16,677                                                        | 23.2        | 1.07 (1.01-1.14) | <b>0.02</b>      |
| Large acute                                      | 25,850                                                        | 36.0        | 1 (ref)          |                  |
| Specialist                                       | 3,224                                                         | 4.5         | 1.54 (1.36-1.76) | <b>&lt;0.001</b> |
| Teaching                                         | 19,802                                                        | 27.6        | 1.03 (0.98-1.10) | 0.24             |
| Foundation status                                | n                                                             | %           | OR (95% CI)      | p-value          |
| No                                               | 31,798                                                        | 44.3        | 0.82 (0.78-0.85) | <b>&lt;0.001</b> |
| Yes                                              | 39,995                                                        | 55.7        | 1 (ref)          |                  |
| CQC trust quality rating (2008/9)                | n                                                             | %           | OR (95% CI)      | p-value          |
| Weak                                             | 3,926                                                         | 5.6         | 0.85 (0.77-0.94) | <b>0.001</b>     |
| Fair                                             | 18,482                                                        | 26.2        | 0.97 (0.92-1.03) | 0.34             |
| Good                                             | 28,425                                                        | 40.3        | 1 ref            |                  |
| Excellent                                        | 19,748                                                        | 28.0        | 1.17 (1.10-1.24) | <b>&lt;0.001</b> |
| Frontline staff satisfied with care <sup>a</sup> | Quintiles of frontline staff satisfied with care <sup>b</sup> |             |                  |                  |
| Mean                                             | 63.5%                                                         |             | OR (95% CI)      | p-value          |
| Median                                           | 62.7%                                                         | 1 (lowest)  | 1 (ref)          |                  |
| Range                                            | 35.3 - 94.0%                                                  | 2           | 1.10 (1.03-1.19) | <b>0.01</b>      |
|                                                  |                                                               | 3           | 1.11 (1.03-1.19) | <b>0.004</b>     |
|                                                  |                                                               | 4           | 1.17 (1.09-1.26) | <b>&lt;0.001</b> |
|                                                  |                                                               | 5 (highest) | 1.35 (1.25-1.45) | <b>&lt;0.001</b> |

Total number of respondents=71,793. CQC trust quality rating was unknown for 3 trusts (1.7% of respondents) and the proportion of frontline staff satisfied with care was unknown for 1 trust (1.7% of respondents). Significant associations at  $\alpha=0.05$  level highlighted in bold.

<sup>a</sup> Calculated from responses to Q12d from the National NHS Staff Survey 2012

<sup>b</sup> Trusts were categorised into quintiles according to the proportion of staff responding positively to Q12d

Abbreviations: CQC=Care Quality Commission

### Variation in rating of care by patient, clinical and trust-level factors

Unadjusted associations between patient, clinical and trust-level characteristics and Q70 from univariate logistic regression analysis are shown in Tables 1 & 2. Among all respondents, statistically significant variation in overall rating of care by patient-level characteristics such as ethnicity, gender, age and long-standing conditions was observed. For example, women were less likely than men, and non-white patients were less likely than white patients, to rate their overall care very good or excellent. Chinese patients reported least favourably among non-white ethnic minorities.

1  
2 Younger and older patients were less likely than 66-75 year olds to rate their care very  
3 good or excellent, with the youngest patients (16-24 year olds) least likely to report  
4 excellent or very good overall care. Patients with any long-standing condition were less  
5 positive about their overall care; those with a learning disability or mental health  
6 condition were the least satisfied.  
7  
8  
9  
10  
11  
12

13  
14  
15  
16  
17 Clinical and trust-level characteristics were also associated with overall rating of care.  
18 With the exception of breast and skin cancer patients, all other patients were less likely  
19 than those with haematological cancers to rate their care as very good or excellent.  
20  
21 Inpatients, patients who began their treatment more than one year ago and those who  
22 attended large acute trusts, trusts without foundation status or trusts with a “weak”  
23 CQC rating were also less likely to rate their care as very good or excellent.  
24  
25  
26  
27  
28  
29  
30  
31  
32  
33

#### 34 **Variation in patients’ rating of care adjusting for clinical and trust-level factors**

35  
36  
37 After excluding those with missing demographic, clinical or trust-level data, or those  
38 who did not provide a rating of their overall care, 60,528 respondents from 150 trusts  
39 remained for complete-case analysis. The distribution of patient, clinical and trust-level  
40 characteristics in the “complete-case” and “all respondents” populations was similar  
41 (Supplementary Table 1) and there was little difference in the univariate associations  
42 between the demographic characteristics and overall rating of care (with the exception  
43 of being deaf/having a hearing impairment which was not associated with a poorer  
44 rating of overall care during complete-case analysis, Table 3). Model 1 in Table 3  
45 shows the effect of mutually adjusting for all patient-level factors. The observed  
46 variation in rating under univariate logistic regression was mostly unaffected; negative  
47  
48  
49  
50  
51  
52  
53  
54  
55  
56  
57  
58  
59  
60

1  
2 associations between rating overall care positively and being female, younger, non-  
3 white or having a long-standing condition persisted. The magnitude of the associations  
4 was generally stable though there was a slight **increase** in the effect of having a mental  
5 health condition or learning disability and being of mixed ethnicity was no longer  
6 significantly associated. The addition of clinical factors (tumour group, time since first  
7 treatment and in- or day-patient status) to the regression model (Model 2) had little  
8 impact on variation by age or ethnicity, but the negative association between being  
9 female and care rating increased in magnitude. Including trust-level characteristics in  
10 the full multivariate model (Model 3) had a minimal effect on the associations between  
11 patients' socio-demographic characteristics and rating of care. Even when adjusting for  
12 clinical, trust and other patient-level factors clear variation in patients' rating of care by  
13 socio-demographic characteristics such as gender, age, ethnicity and long-standing  
14 conditions was evident. Female, younger, non-White patients or patients with a long-  
15 standing condition remained less likely to rate their overall care as excellent or very  
16 good.  
17  
18  
19  
20  
21  
22  
23  
24  
25  
26  
27  
28  
29  
30  
31  
32  
33  
34  
35  
36  
37  
38  
39  
40  
41  
42  
43  
44  
45  
46  
47  
48  
49  
50  
51  
52  
53  
54  
55  
56  
57  
58  
59  
60

Table 3: Association between positive rating of overall care and demographic characteristics adjusting for patient, clinical and trust-level factors

|                                             | Univariate <sup>a</sup> |                  | Model 1 <sup>b</sup>       |                  | Multivariate Model 2 <sup>c</sup> |                  | Model 3 <sup>d</sup>       |                  |
|---------------------------------------------|-------------------------|------------------|----------------------------|------------------|-----------------------------------|------------------|----------------------------|------------------|
|                                             | OR (95% CI)             | p-value          | OR <sub>adj</sub> (95% CI) | p-value          | OR <sub>adj</sub> (95% CI)        | p-value          | OR <sub>adj</sub> (95% CI) | p-value          |
| <b>Gender</b>                               |                         |                  |                            |                  |                                   |                  |                            |                  |
| Male                                        | 1 (ref)                 |                  | 1 (ref)                    |                  | 1 (ref)                           |                  | 1 (ref)                    |                  |
| Female                                      | <b>0.91</b> (0.87-0.96) | <b>&lt;0.001</b> | 0.93 (0.88-0.98)           | <b>0.02</b>      | 0.72 (0.68-0.76)                  | <b>&lt;0.001</b> | 0.72 (0.68-0.77)           | <b>&lt;0.001</b> |
| <b>Age group</b>                            |                         |                  |                            |                  |                                   |                  |                            |                  |
| 16 - 25                                     | <b>0.65</b> (0.48-0.90) | <b>0.01</b>      | 0.68 (0.48-0.98)           | <b>0.04</b>      | 0.61 (0.43-0.88)                  | <b>0.01</b>      | 0.58 (0.41-0.82)           | <b>0.002</b>     |
| 26 - 35                                     | <b>0.67</b> (0.55-0.81) | <b>&lt;0.001</b> | 0.71 (0.60-0.86)           | <b>0.001</b>     | 0.64 (0.53-0.77)                  | <b>&lt;0.001</b> | 0.62 (0.51-0.75)           | <b>&lt;0.001</b> |
| 36 - 50                                     | <b>0.68</b> (0.63-0.75) | <b>&lt;0.001</b> | 0.71 (0.65-0.78)           | <b>&lt;0.001</b> | 0.61 (0.56-0.67)                  | <b>&lt;0.001</b> | 0.60 (0.54-0.65)           | <b>&lt;0.001</b> |
| 51 - 65                                     | <b>0.76</b> (0.72-0.81) | <b>&lt;0.001</b> | 0.77 (0.73-0.82)           | <b>&lt;0.001</b> | 0.73 (0.68-0.77)                  | <b>&lt;0.001</b> | 0.72 (0.68-0.77)           | <b>&lt;0.001</b> |
| 66 - 75                                     | 1 (ref)                 |                  | 1 (ref)                    |                  | 1 (ref)                           |                  | 1 (ref)                    |                  |
| 76+                                         | <b>0.85</b> (0.79-0.91) | <b>&lt;0.001</b> | 0.86 (0.80-0.93)           | <b>&lt;0.001</b> | 0.90 (0.83-0.97)                  | <b>0.01</b>      | 0.90 (0.84-0.98)           | <b>0.01</b>      |
| <b>Ethnicity</b>                            |                         |                  |                            |                  |                                   |                  |                            |                  |
| White                                       | 1 (ref)                 |                  | 1 (ref)                    |                  | 1 (ref)                           |                  | 1 (ref)                    |                  |
| Mixed                                       | <b>0.65</b> (0.44-0.97) | <b>0.04</b>      | 0.70 (0.45-1.10)           | 0.12             | 0.68 (0.44-1.08)                  | 0.10             | 0.67 (0.43-1.04)           | 0.08             |
| Asian                                       | <b>0.35</b> (0.30-0.40) | <b>&lt;0.001</b> | 0.37 (0.31-0.44)           | <b>&lt;0.001</b> | 0.35 (0.30-0.42)                  | <b>&lt;0.001</b> | 0.35 (0.30-0.41)           | <b>&lt;0.001</b> |
| Black                                       | <b>0.45</b> (0.37-0.53) | <b>&lt;0.001</b> | 0.46 (0.38-0.56)           | <b>&lt;0.001</b> | 0.46 (0.37-0.56)                  | <b>&lt;0.001</b> | 0.43 (0.36-0.53)           | <b>&lt;0.001</b> |
| Chinese                                     | <b>0.26</b> (0.18-0.38) | <b>&lt;0.001</b> | 0.28 (0.19-0.41)           | <b>&lt;0.001</b> | 0.29 (0.20-0.42)                  | <b>&lt;0.001</b> | 0.27 (0.18-0.41)           | <b>&lt;0.001</b> |
| Other                                       | <b>0.61</b> (0.47-0.77) | <b>&lt;0.001</b> | 0.62 (0.48-0.79)           | <b>&lt;0.001</b> | 0.61 (0.47-0.79)                  | <b>&lt;0.001</b> | 0.61 (0.47-0.77)           | <b>&lt;0.001</b> |
| <b>Long-standing conditions<sup>e</sup></b> |                         |                  |                            |                  |                                   |                  |                            |                  |
| Deafness/hearing impairment                 | <b>0.95</b> (0.87-1.02) | <b>0.16</b>      | 0.93 (0.85-0.99)           | 0.09             | 0.93 (0.85-1.01)                  | 0.09             | 0.93 (0.85-1.01)           | 0.09             |
| Blindness/visual impairment                 | <b>0.78</b> (0.68-0.90) | <b>0.001</b>     | 0.85 (0.74-0.97)           | <b>0.01</b>      | 0.85 (0.75-0.98)                  | <b>&lt;0.001</b> | 0.86 (0.75-0.99)           | <b>0.03</b>      |
| Physical condition                          | <b>0.73</b> (0.68-0.78) | <b>&lt;0.001</b> | 0.73 (0.69-0.77)           | <b>&lt;0.001</b> | 0.73 (0.69-0.77)                  | <b>&lt;0.001</b> | 0.74 (0.70-0.78)           | <b>&lt;0.001</b> |
| Learning disability                         | <b>0.49</b> (0.38-0.65) | <b>&lt;0.001</b> | 0.66 (0.49-0.88)           | <b>0.01</b>      | 0.68 (0.51-0.90)                  | <b>0.01</b>      | 0.67 (0.50-0.90)           | <b>0.01</b>      |
| Mental health condition                     | <b>0.58</b> (0.50-0.67) | <b>&lt;0.001</b> | 0.65 (0.57-0.74)           | <b>&lt;0.001</b> | 0.65 (0.57-0.74)                  | <b>&lt;0.001</b> | 0.65 (0.57-0.74)           | <b>&lt;0.001</b> |
| Long-standing illness                       | <b>0.79</b> (0.74-0.85) | <b>&lt;0.001</b> | 0.79 (0.74-0.85)           | <b>&lt;0.001</b> | 0.80 (0.75-0.86)                  | <b>&lt;0.001</b> | 0.81 (0.75-0.87)           | <b>&lt;0.001</b> |

Significant associations at  $\alpha=0.05$  level with clustered robust standard errors highlighted in bold.

<sup>a</sup> Figures may differ from those presented in Tables 1 & 2 as they are based on 60,528 respondents from 150 trusts with complete data (i.e. complete-case analysis)

<sup>b</sup> Adjusted for patient factors (i.e. ethnicity, gender, age group, specific long-standing conditions)

<sup>c</sup> Adjusted for patient factors and clinical factors (i.e. patient status, tumour group and time since first treatment)

<sup>d</sup> Adjusted for patient factors, clinical factors and trust-level factors (i.e. trust type, foundation status, CQC trust quality rating and quintile of frontline staff satisfied with care)

<sup>e</sup> Reference category for specific long-standing conditions is not having that condition Abbreviations: OR=odds ratio; CI=confidence interval, ref=reference category



## DISCUSSION

Our analysis of the 2011-2012 NCPES demonstrates that there is marked variation in the experiences of cancer patients by socio-demographic factors. Women, younger patients, ethnic minorities and patients with a long-standing condition or disability were less likely to rate their cancer care as “*excellent*” or “*very good*”. This variation remained after adjusting for clinical factors, such as tumour group and duration of treatment, and trust-level factors. This suggests that the variation by socio-demographic factors is not a result of confounding but is attributable to real differences in experiences among these groups.

To the authors’ knowledge, this was the first study to explore cancer patients’ overall rating of care by socio-demographic characteristics including longstanding-conditions or disabilities. A principal strength of this study is the large sample size (> 71,000) and the response rate of 68%, which was significantly higher than that achieved by comparable surveys (22,23). Also, as all cancer patients treated by the NHS in England during the assigned 3 month study period were sent the survey, it is likely that findings can be generalised to the wider population of cancer patients. The main limitations of this study relate to the type of data available. The data for the trust quality score was collected approximately three years prior to the NCPES survey period and so may not reflect the quality of the trust at the time of patient admission. The influence of other potentially important predictors of patient experience such as employment status (20), level of deprivation (5) and health status (2,8,24) could not be explored as these data are not gathered through the NCPES. Furthermore, the binary categorisation of patients’ responses, as per DH Survey Guidance, condenses the patients’ experiences (which were already limited to several multiple choice options) and may mask potentially significant variation.

1  
2  
3  
4 Interpretation of the findings from NCPES data requires consideration of the possible  
5 determinants of variation in patients' responses to a survey question. Firstly, it is  
6 possible that variation reflects differing health, emotional or other support needs that  
7 are not met by cancer care services (12,14,25). Secondly, differential expectations  
8 between patient groups, perhaps pertaining to socio-cultural norms, may contribute to  
9 the observed patterns (8,26). Thirdly, certain patient groups may have a tendency to  
10 respond less positively, based on shared norms regarding feedback and ideas as to its  
11 purpose (26). Finally, variation may reflect real differences in the quality of care  
12 provided (8,26).  
13  
14  
15  
16  
17  
18  
19  
20  
21  
22  
23  
24

25  
26 Studies of patient experience in the general patient population have demonstrated  
27 systematic differences in experience by gender, age and ethnicity and the results of  
28 our study further add to this knowledge by demonstrating that similar variation exists  
29 among cancer patients. Adjusting for other socio-demographic factors, women were  
30 less likely to report positive experiences than men. This may be due to the increased  
31 emotional and support needs among female cancer patients described elsewhere  
32 (13,14). Breast cancer was the most common tumour group for females (38.4%,  
33 n=14,591) and in comparison to other tumour groups breast cancer patients were  
34 more likely to rate their care positively. Notably, when clinical factors such as tumour  
35 group were adjusted for, the magnitude of the negative association between gender  
36 and overall care rating increased. This may indicate that while patient experience  
37 varies modestly overall by gender there are marked differences between men and  
38 women with less common cancers. This is an area which merits further exploration.  
39  
40  
41  
42  
43  
44  
45  
46  
47  
48  
49  
50  
51  
52  
53  
54  
55  
56  
57  
58  
59  
60

1  
2 Younger patients were less likely to report positive experiences than older patients,  
3  
4 which corroborates previous findings in relation to age and patient satisfaction (4–8,13,  
5  
6 27). It has been suggested that this observation may reflect a generational  
7  
8 phenomenon, whereby older patients' responses are influenced by comparisons with  
9  
10 their parents' generation who may not have had access to advanced technologies of  
11  
12 modern treatment or the free care provided by the NHS, referred to as 'gratitude bias'  
13  
14 (28,29). Alternatively, younger patients may have higher expectations of quality of care  
15  
16 due to a reduced frequency of hospital visits compared to older patients (17). The  
17  
18 poorer rating of care in the oldest age group (76+ years) fits with neither theory and  
19  
20 further work to understand the cause of the variation in cancer patient experience by  
21  
22 age is required.  
23  
24  
25  
26  
27

28  
29 Ethnic minorities, especially Asian and specifically Chinese patients, reported less  
30  
31 positive experiences than white patients. This trend is similar to findings from previous  
32  
33 studies exploring variation in patient experiences of care generally (2,4,5) and  
34  
35 specifically for cancer (17,22). The extent to which these results are due to cultural  
36  
37 differences in expectations of care or willingness to criticise is unclear and  
38  
39 necessitates further research. Of significant concern is the possibility that these  
40  
41 patients experience poorer quality of care owing to a lack of understanding of the care  
42  
43 needs of these minority groups or to discrimination, unintended or otherwise (8).  
44  
45  
46  
47  
48

49 Patients with various long-standing conditions reported significantly less positive  
50  
51 patient experiences than those without. The worst experiences were reported by  
52  
53 patients with a learning disability or mental health condition. Given the small numbers  
54  
55 of patients in these groups and the strength of the association it seems likely that there  
56  
57 is marked variation in their experiences compared to other patients. Patients with long-  
58  
59  
60

1  
2 standing illnesses such as diabetes and chronic heart disease were also less likely to  
3  
4 rate their care as “excellent” or “very good.” Given that the number of patients with  
5  
6 such illnesses is set to rise in the future with an ageing patient population it is  
7  
8 important to explore how having co-morbidities influences patients’ experience of  
9  
10 cancer care.  
11

12  
13  
14  
15 This study presents evidence of inequalities in experiences of cancer care by gender,  
16  
17 age, ethnicity and disability. Whilst it is possible that some of the variation observed  
18  
19 between patient groups is a result of varying socio-cultural expectations or tendencies  
20  
21 to rate care positively, it is also possible that the quality of care truly differs between  
22  
23 patient groups. Further investigation of the experiences of women, ethnic minorities,  
24  
25 younger patients and those with a disability is needed so that cancer care services can  
26  
27 be better tailored to meet the needs and expectations of these groups. Analysis of the  
28  
29 NCPES qualitative free text questions and other patient experience data at a trust level  
30  
31 would help to inform quality improvement initiatives. The findings of this study would  
32  
33 appear to suggest that, if used as a comparative performance indicator (as is NCPES  
34  
35 data) patient experience measures should be adjusted for age, gender and ethnicity.  
36  
37 An unadjusted measure of performance could unfairly disadvantage hospital trusts  
38  
39 with higher than average proportion of ethnic minority patients, for example. However,  
40  
41 the impact of adjusting NCPES data for demographic characteristics on trust rankings  
42  
43 has been shown to be minimal (30). Adjusting for gender, age and ethnicity causes  
44  
45 few trusts to move into or out of the top or bottom 20% of trusts nationally. While they  
46  
47 may not account for much of the between-trust variation in cancer patient experience  
48  
49 the overall variation in patient experience by demographic factors is important in its  
50  
51 own right and warrants further attention.  
52  
53  
54  
55  
56  
57  
58  
59  
60

1  
2 Responses to survey questions are a result of patients' perception and interpretation of  
3  
4 events, which are shaped by expectations and clinical or emotional needs, in addition  
5  
6 to the quality of services received. Meeting the care needs of all patients equally is a  
7  
8 fundamental principle of the NHS and high-quality cancer services must strive to meet  
9  
10 the needs of its diverse patient population. This study identifies patient groups for  
11  
12 which cancer care services are in greatest need of improvement.  
13  
14  
15  
16  
17  
18  
19  
20  
21  
22

### 23 **KEY MESSAGES (3-4 sentences less than 25 words each)**

- 24  
25 • Adjusting for clinical and trust-level factors, there is evidence of inequalities in  
26  
27 patients' experiences of cancer care by socio-demographic characteristics.  
28
- 29  
30 • Female, younger and non-white (especially Asian) cancer patients are less  
31  
32 likely to rate their overall care as excellent or very good.  
33
- 34  
35 • Patients with a long-standing condition also report poorer overall care, patients  
36  
37 with a learning disability or mental health condition being least satisfied.  
38
- 39  
40 • While patient experience varies modestly overall by gender, there may be  
41  
42 marked differences between the experiences of men and women with less  
43  
44 common cancers.  
45  
46  
47  
48  
49  
50  
51  
52  
53  
54  
55  
56  
57  
58  
59  
60

## LICENCE FOR PUBLICATION STATEMENT

The Corresponding Author has the right to grant on behalf of all authors and does grant on behalf of all authors, an exclusive licence (or non-exclusive for government employees) on a worldwide basis to the BMJ Group and co-owners or contracting owning societies (where published by the BMJ Group on their behalf), and its Licensees to permit this article (if accepted) to be published in Sexually Transmitted Infections and any other BMJ Group products and to exploit all subsidiary rights, as set out in our licence <http://group.bmj.com/products/journals/instructions-for-authors/licence-forms>.

**Acknowledgements:** None

**Contributorship statement:** HW devised the study, advised on data analysis and participated in interpreting the data and reviewing the manuscript; SD participated in interpreting the data and reviewing the manuscript; LM carried out supplementary data analysis, participated in interpreting the data and co-prepared the manuscript; AB carried out the statistical analysis, interpreted the data and co-prepared the manuscript.

**Funding:** There was no specific funding for this project. HW, SD and LM are supported by the NIHR Imperial College Healthcare NHS Trust Biomedical Research Centre and Imperial College Healthcare Charity.

**Competing interests:** None

**Ethics:** No ethical approval was required for this study

**Data sharing:** The National Cancer Patient Experience Survey 2012-13 dataset used is available for download from <http://ukdataservice.ac.uk>.

## REFERENCES

1. NHS England. Putting patients first: The NHS England business plan for 2013/14 – 2015/16. 2012 p. 1–64.
2. Healthcare Commission. Variations in the experiences of patients in England: Analysis of the Healthcare Commission's 2003/2004 national surveys of patients. London; 2005 p. 1–35.
3. Department of Health. Report on the self reported experience of patients from black and minority ethnic groups. London; 2009 p. 1–31.
4. Campbell JL, Ramsay J, Green J. Age, gender, socioeconomic, and ethnic differences in patients' assessments of primary health care. *Qual Health Care* 2001;**10**(2):90–5.
5. Commission for Health Improvement. Unpacking the patients' perspective: Variations in NHS patient experience in England. London; 2004 p. 1–112.
6. Sizmur S. Multilevel analysis of inpatient experience. Picker Institute Europe. 2011 p. 1–28.
7. Jenkinson C, Coulter A, Bruster S, et al. Patients' experiences and satisfaction with health care: results of a questionnaire study of specific aspects of care. *Qual Saf Health Care* 2002;**11**(4):335–9.
8. Lyratzopoulos G, Elliott M, Barbiere JM, et al. Understanding ethnic and other socio-demographic differences in patient experience of primary care: evidence

- 1  
2 from the English General Practice Patient Survey. *BMJ Qual Saf*  
3  
4 2012;**21**(1):21–9.  
5  
6  
7  
8 9. Mead N, Roland M. Understanding why some ethnic minority patients evaluate  
9 medical care more negatively than white patients: a cross sectional analysis of a  
10 routine patient survey in English general practices. *BMJ* 2009;**339**:b3450.  
11  
12  
13  
14  
15  
16 10. Department of Health. Improving Outcomes: A Strategy for Cancer. 2011 p. 1–  
17 99.  
18  
19  
20  
21 11. Davidson R, Mills ME. Cancer patients' satisfaction with communication,  
22 information and quality of care in a UK region. *Eur J Cancer Care (Engl)*  
23 2005;**14**(1):83–90.  
24  
25  
26  
27  
28  
29 12. Cox A, Jenkins V, Catt S, et al. Information needs and experiences: an audit of  
30 UK cancer patients. *Eur J Oncol Nurs* 2006;**10**(4):263–72.  
31  
32  
33  
34  
35 13. Clarke S, Booth L, Velikova G, et al. Social support: gender differences in cancer  
36 patients in the United Kingdom. *Cancer Nurs* 2006;**29**(1):66–72.  
37  
38  
39  
40 14. Morrison V, Henderson BJ, Zinovieff F, et al. Common, important, and unmet  
41 needs of cancer outpatients. *Eur J Oncol Nurs* 2012;**16**:115–23.  
42  
43  
44  
45  
46 15. Department of Health. Cancer Patient Experience Survey 2011/12: National  
47 Report. 2011 p. 1–168.  
48  
49  
50  
51 16. Saunders CL, Abel GA, El Turabi A, et al. Accuracy of routinely recorded ethnic  
52 group information compared with self-reported ethnicity: evidence from the  
53 English Cancer Patient Experience Survey. *BMJ Open*. 2013;**3**(6):1–9.  
54  
55  
56  
57  
58  
59  
60



17. El Turabi A, Abel GA, Roland M, et al. Variation in reported experience of involvement in cancer treatment decision making: evidence from the National Cancer Patient Experience Survey. *Br J Cancer* 2013;**109**(3):780–7.
18. Ipsos MORI. Frontiers of performance in the NHS II. 2008 p. 1–100.
19. Raleigh VS, Frosini F, Sizmur S, et al. Do some trusts deliver a consistently better experience for patients? An analysis of patient experience across acute care surveys in English NHS trusts. *BMJ Qual Saf* 2012;**21**(5):381–90.
20. Kontopantelis E, Roland M, Reeves D. Patient experience of access to primary care: identification of predictors in a national patient survey. *BMC Fam Pract* 2010;**11**(61):1–15.
21. Kreft IG, de Leeuw J. *Introducing Multilevel Modeling*. London: SAGE Publications; 2002.
22. Lyratzopoulos G, Neal RD, Barbiere JM, et al. Variation in number of general practitioner consultations before hospital referral for cancer: findings from the 2010 National Cancer Patient Experience Survey in England. *Lancet Oncol* 2012;**13**(4):353–65.
23. Care Quality Commission. National NHS patient survey programme: Survey of adult inpatients 2012. 2013 p. 1–34.
24. Cohen G. Age and health status in a patient satisfaction survey. *Soc Sci Med* 1996;**42**(7):1085–93.
25. Pinquart M, Duberstein PR. Information needs and decision-making processes in older cancer patients. *Crit Rev Oncol Hematol* 2004;**51**(1):69–80.

- 1  
2  
3  
4  
5  
6  
7  
8  
9  
10  
11  
12  
13  
14  
15  
16  
17  
18  
19  
20  
21  
22  
23  
24  
25  
26  
27  
28  
29  
30  
31  
32  
33  
34  
35  
36  
37  
38  
39  
40  
41  
42  
43  
44  
45  
46  
47  
48  
49  
50  
51  
52  
53  
54  
55  
56  
57  
58  
59  
60
26. Perneger T. Adjustment for patient characteristics in satisfaction surveys. *Int J Qual Heal Care* 2004;**16**(6):433–5.
  27. Crow R, Gage H, Hampson S, et al. The measurement of satisfaction practice from a systematic review. *Health Technol Assess* 2002;**6**(32):1–250.
  28. Department of Health. Methods, reasoning and scope: Statement of methodology for the overall patient experience scores. 2013 p. 1–28.
  29. Bowling A. An “inverse satisfaction law”? Why don’t older patients criticise health services? *J Epidemiol Community Health* 2002;**56**(7):482.
  30. Saunders K, Lyratzopoulos G, Abel G. Is case-mix adjustment important for the National Cancer Patient Experience Survey in England? Cambridge Centre for Health Services Research; 2013 p. 1–12.

1  
2  
3  
4  
5  
6  
7  
8  
9  
10  
11  
12  
13  
14  
15  
16  
17  
18  
19  
20  
21  
22  
23  
24  
25  
26  
27  
28  
29  
30  
31  
32  
33  
34  
35  
36  
37  
38  
39  
40  
41  
42  
43  
44  
45  
46  
47  
48  
49  
50  
51  
52  
53  
54  
55  
56  
57  
58  
59  
60

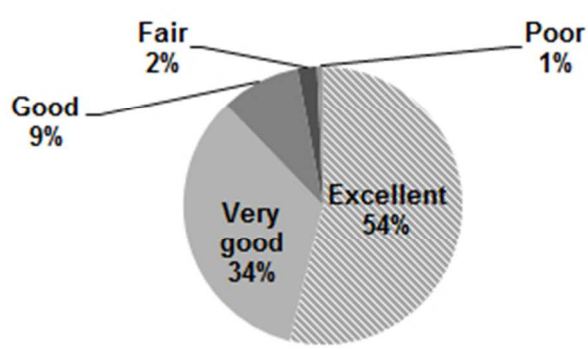

Responses from NCPES 2011-12 to Q70 "Overall, how would you rate your care?"

peer review only

Supplementary table 1: Comparison of the distribution of patient, clinical and trust-level factors in "Case-complete" and "All respondents" populations

|                                    |                                   | Case-complete | All respondents                          |                                                         |                       | Case-complete | All respondents |
|------------------------------------|-----------------------------------|---------------|------------------------------------------|---------------------------------------------------------|-----------------------|---------------|-----------------|
| <b>Patient factors</b>             | <b>Gender</b>                     |               |                                          | <b>Clinical factors</b>                                 | <b>Tumour group</b>   |               |                 |
|                                    | Male                              | 46.8%         | 47.1%                                    |                                                         | Brain/CNS             | 1.0%          | 1.0%            |
|                                    | Female                            | 53.2%         | 52.9%                                    |                                                         | Breast                | 20.7%         | 20.5%           |
|                                    | <b>Age group</b>                  |               |                                          |                                                         | Colorectal / Lower GI | 13.2%         | 13.2%           |
|                                    | 16 - 25                           | 0.5%          | 0.5%                                     |                                                         | Gynaecological        | 6.0%          | 5.9%            |
|                                    | 26 - 35                           | 1.4%          | 1.4%                                     |                                                         | Haematological        | 15.6%         | 15.4%           |
|                                    | 36 - 50                           | 9.7%          | 9.5%                                     |                                                         | Head and Neck         | 3.4%          | 3.4%            |
|                                    | 51 - 65                           | 32.3%         | 31.9%                                    |                                                         | Lung                  | 7.1%          | 7.0%            |
|                                    | 66 - 75                           | 33.1%         | 32.9%                                    |                                                         | Other                 | 1.6%          | 1.6%            |
|                                    | 76+                               | 23.1%         | 23.9%                                    |                                                         | Prostate              | 7.7%          | 8.1%            |
|                                    | <b>Ethnicity</b>                  |               |                                          | Sarcoma                                                 | 3.5%                  | 3.4%          |                 |
|                                    | White                             | 96.1%         | 88.7%                                    | Skin                                                    | 2.3%                  | 2.4%          |                 |
|                                    | Mixed                             | 0.3%          | 0.3%                                     | Upper GI                                                | 6.3%                  | 6.3%          |                 |
|                                    | Asian/Asian British               | 1.5%          | 1.5%                                     | Urological                                              | 11.7%                 | 11.8%         |                 |
|                                    | Black/Black British               | 1.2%          | 1.2%                                     | <b>Trust factors</b>                                    | <b>Trust type</b>     |               |                 |
|                                    | Chinese                           | 0.2%          | 0.2%                                     |                                                         | Small acute           | 8.6%          | 8.7%            |
|                                    | Other                             | 0.7%          | 0.7%                                     |                                                         | Medium acute          | 22.6%         | 23.2%           |
|                                    | <b>Long-standing conditions</b>   |               |                                          |                                                         | Large acute           | 35.8%         | 36.0%           |
|                                    | None                              | 65.9%         | 67.2%                                    |                                                         | Specialist            | 4.8%          | 4.5%            |
|                                    | Deafness/hearing impairment       | 10.5%         | 10.1%                                    |                                                         | Teaching              | 28.2%         | 27.6%           |
| Blindness/partially sighted        | 2.6%                              | 2.6%          | <b>Foundation status</b>                 |                                                         |                       |               |                 |
| Physical condition                 | 13.7%                             | 13.0%         | No                                       |                                                         | 42.0%                 | 44.3%         |                 |
| Learning disability                | 0.5%                              | 0.5%          | Yes                                      |                                                         | 58.0%                 | 55.7%         |                 |
| Mental health condition            | 1.9%                              | 1.9%          | <b>CQC trust quality rating (2008/9)</b> |                                                         |                       |               |                 |
| Long-standing illness <sup>a</sup> | 13.5%                             | 12.9%         | Weak                                     | 5.3%                                                    | 5.6%                  |               |                 |
| <b>Clinical factors</b>            | <b>Patient status</b>             |               |                                          | Fair                                                    | 26.4 %                | 26.2%         |                 |
|                                    | Day case                          | 63.8%         | 63.7%                                    | Good                                                    | 40.2%                 | 40.3%         |                 |
|                                    | Inpatient                         | 36.2%         | 36.3%                                    | Excellent                                               | 28.1%                 | 28.0%         |                 |
|                                    | <b>Time since first treatment</b> |               |                                          | <b>Frontline staff satisfied with care <sup>b</sup></b> |                       |               |                 |
|                                    | < 1 year                          | 64.5%         | 62.3%                                    | Mean                                                    | 63.1%                 | 63.5%         |                 |
|                                    | 1-5 years                         | 26.1%         | 24.4%                                    | Median                                                  | 63.45                 | 62.7%         |                 |
| >5 years                           | 9.4%                              | 8.7%          | Range                                    | 35.3 – 94.0%                                            | 35.3 - 94.0%          |               |                 |

Number of respondents=60,528 for "Case-complete" population and 71,793 for "All respondents" population.  
Significant differences at  $\alpha=0.05$  level highlighted in bold.

<sup>a</sup> Such as (but not limited to) HIV, diabetes, chronic heart disease or epilepsy  
<sup>b</sup> Calculated from responses to Q12d from the National NHS Staff Survey 2012

STROBE Statement—Checklist of items that should be included in reports of *cross-sectional studies*

|                           | Item No | Recommendation                                                                                                                                                                                    |     | Note                         |
|---------------------------|---------|---------------------------------------------------------------------------------------------------------------------------------------------------------------------------------------------------|-----|------------------------------|
| <b>Title and abstract</b> | 1       | (a) Indicate the study’s design with a commonly used term in the title or the abstract                                                                                                            | ✓   |                              |
|                           |         | (b) Provide in the abstract an informative and balanced summary of what was done and what was found                                                                                               | ✓   |                              |
| <b>Introduction</b>       |         |                                                                                                                                                                                                   |     |                              |
| Background/rationale      | 2       | Explain the scientific background and rationale for the investigation being reported                                                                                                              | ✓   |                              |
| Objectives                | 3       | State specific objectives, including any pre-specified hypotheses                                                                                                                                 | ✓   |                              |
| <b>Methods</b>            |         |                                                                                                                                                                                                   |     |                              |
| Study design              | 4       | Present key elements of study design early in the paper                                                                                                                                           | ✓   |                              |
| Setting                   | 5       | Describe the setting, locations, and relevant dates, including periods of recruitment, exposure, follow-up, and data collection                                                                   | ✓   |                              |
| Participants              | 6       | (a) Give the eligibility criteria, and the sources and methods of selection of participants                                                                                                       | ✓   |                              |
| Variables                 | 7       | Clearly define all outcomes, exposures, predictors, potential confounders, and effect modifiers. Give diagnostic criteria, if applicable                                                          | ✓   |                              |
| Data sources/ measurement | 8*      | For each variable of interest, give sources of data and details of methods of assessment (measurement). Describe comparability of assessment methods if there is more than one group              | ✓   |                              |
| Bias                      | 9       | Describe any efforts to address potential sources of bias                                                                                                                                         | N/A | No weights available         |
| Study size                | 10      | Explain how the study size was arrived at                                                                                                                                                         | N/A | Response rate described      |
| Quantitative variables    | 11      | Explain how quantitative variables were handled in the analyses.                                                                                                                                  | ✓   |                              |
|                           |         | If applicable, describe which groupings were chosen and why                                                                                                                                       | ✓   |                              |
| Statistical methods       | 12      | (a) Describe all statistical methods, including those used to control for confounding                                                                                                             | ✓   |                              |
|                           |         | (b) Describe any methods used to examine subgroups and interactions                                                                                                                               | N/A | No sub-analyses done         |
|                           |         | (c) Explain how missing data were addressed                                                                                                                                                       | ✓   |                              |
|                           |         | (d) If applicable, describe analytical methods taking account of sampling strategy                                                                                                                | ✓   |                              |
|                           |         | (e) Describe any sensitivity analyses                                                                                                                                                             | N/A | No sensitivity analyses done |
| <b>Results</b>            |         |                                                                                                                                                                                                   |     |                              |
| Participants              | 13*     | (a) Report numbers of individuals at each stage of study—eg numbers potentially eligible, examined for eligibility, confirmed eligible, included in the study, completing follow-up, and analysed | ✓   |                              |

|                          |     |                                                                                                                                                                                                              |     |  |
|--------------------------|-----|--------------------------------------------------------------------------------------------------------------------------------------------------------------------------------------------------------------|-----|--|
|                          |     | (b) Give reasons for non-participation at each stage                                                                                                                                                         | N/A |  |
|                          |     | (c) Consider use of a flow diagram                                                                                                                                                                           | N/A |  |
| Descriptive data         | 14* | (a) Give characteristics of study participants (eg demographic, clinical, social) and information on exposures and potential confounders                                                                     | ✓   |  |
|                          |     | (b) Indicate number of participants with missing data for each variable of interest                                                                                                                          | ✓   |  |
| Outcome data             | 15* | Report numbers of outcome events or summary measures                                                                                                                                                         | ✓   |  |
| Main results             | 16  | (a) Give unadjusted estimates and, if applicable, confounder-adjusted estimates and their precision (eg, 95% confidence interval). Make clear which confounders were adjusted for and why they were included | ✓   |  |
|                          |     | (b) Report category boundaries when continuous variables were categorized                                                                                                                                    | ✓   |  |
|                          |     | (c) If relevant, consider translating estimates of relative risk into absolute risk for a meaningful time period                                                                                             | N/A |  |
| Other analyses           | 17  | Report other analyses done—eg analyses of subgroups and interactions, and sensitivity analyses                                                                                                               | N/A |  |
| <b>Discussion</b>        |     |                                                                                                                                                                                                              |     |  |
| Key results              | 18  | Summarise key results with reference to study objectives                                                                                                                                                     | ✓   |  |
| Limitations              | 19  | Discuss limitations of the study, taking into account sources of potential bias or imprecision. Discuss both direction and magnitude of any potential bias                                                   | ✓   |  |
| Interpretation           | 20  | Give a cautious overall interpretation of results considering objectives, limitations, multiplicity of analyses, results from similar studies, and other relevant evidence                                   | ✓   |  |
| Generalisability         | 21  | Discuss the generalisability (external validity) of the study results                                                                                                                                        | ✓   |  |
| <b>Other information</b> |     |                                                                                                                                                                                                              |     |  |
| Funding                  | 22  | Give the source of funding and the role of the funders for the present study and, if applicable, for the original study on which the present article is based                                                | ✓   |  |

\*Give information separately for exposed and unexposed groups.

**Note:** An Explanation and Elaboration article discusses each checklist item and gives methodological background and published examples of transparent reporting. The STROBE checklist is best used in conjunction with this article (freely available on the Web sites of PLoS Medicine at <http://www.plosmedicine.org/>, Annals of Internal Medicine at <http://www.annals.org/>, and Epidemiology at <http://www.epidem.com/>). Information on the STROBE Initiative is available at [www.strobe-statement.org](http://www.strobe-statement.org).
